# Supplementary material for: From a mercury(ii) bis(yldiide) complex to actinide yldiides
Source: Royal Society of Chemistry journal article supplement (doi:10.1039/d3cc05553a), 2024-01-01
Supplement: d3cc05553a1.pdf [file d3cc05553a1.pdf]

## From a Mercury(II) Bis(yldiide) Complex to Actinide Yldiides

Mike Jörges,<sup>ab</sup> Alexander J. Gremillion,<sup>ab</sup> Daniel Knyszek,<sup>b</sup> Steven P. Kelley,<sup>a</sup> Justin R. Walensky<sup>\*a</sup>  
and Viktoria H. Gessner<sup>\*b</sup>

<sup>a</sup>Department of Chemistry, University of Missouri, Columbia, MO 65211 USA, Email:  
walenskyj@missouri.edu

<sup>b</sup>Faculty of Chemistry and Biochemistry, Ruhr-University Bochum, 44801 Bochum, Germany, Email:  
viktoria.gessner@rub.de

### Table of Contents

|                                                                                                                                                   |    |
|---------------------------------------------------------------------------------------------------------------------------------------------------|----|
| <b>1. Experimental</b> .....                                                                                                                      | 2  |
| 1.1 Synthesis of [Hg(C(PPh <sub>3</sub> ){P(S)Ph <sub>2</sub> )] <sub>2</sub> .....                                                               | 3  |
| 1.2 Synthesis of [(C <sub>5</sub> Me <sub>5</sub> ) <sub>2</sub> Th(κ <sup>2</sup> -(C,S)-C(PPh <sub>3</sub> ){P(S)Ph <sub>2</sub> }})(Cl)] ..... | 8  |
| 1.3 Synthesis of [(C <sub>5</sub> Me <sub>5</sub> ) <sub>2</sub> U(κ <sup>2</sup> -(C,S)-C(PPh <sub>3</sub> ){P(S)Ph <sub>2</sub> }})(Cl)] .....  | 14 |
| <b>2 Crystal structure determination</b> .....                                                                                                    | 17 |
| 2.1 General information .....                                                                                                                     | 17 |
| 2.2 Crystal Structure Determination of Ylide 1-H and Yldiide 1-K .....                                                                            | 20 |
| 2.3 Crystal Structure Determination of the mercury and actinide complexes .....                                                                   | 22 |
| <b>3 Computational details</b> .....                                                                                                              | 24 |
| 3.1 General .....                                                                                                                                 | 24 |
| 3.2 Results of the bonding analysis of yldiide 1 and its complexes 2-4 .....                                                                      | 24 |
| 3.3 Coordinates of optimized structures .....                                                                                                     | 33 |
| <b>4 Nomenclature and Detailed Bonding Analysis</b> .....                                                                                         | 42 |
| <b>5 Author Contributions</b> .....                                                                                                               | 44 |
| <b>6 References</b> .....                                                                                                                         | 44 |

## 1. Experimental

### 1.1. General considerations

All syntheses were carried out under inert atmosphere of nitrogen using standard Schlenk and glovebox techniques. All glassware used (including NMR tubes) were siliated with  $\text{Me}_3\text{SiCl}$ , at reduced pressure, inside of a glass vacuum desiccator.  $[(\text{C}_5\text{Me}_5)_2\text{UCl}_2]^{[1]}$   $[(\text{C}_5\text{Me}_5)_2\text{ThCl}_2]^{[1]}$   $[\text{K}[\text{C}(\text{PPh}_3)\{\text{P}(\text{S})\text{Ph}_2\}]]^{[2]}$  and  $\text{K}(\text{CH}_2\text{C}_6\text{H}_5)^{[3]}$  were synthesized according to literature procedure.  $[\text{K}[\text{C}(\text{PPh}_3)\{\text{P}(\text{S})\text{Ph}_2\}]]$  was prepared from  $\text{HC}(\text{PPh}_3)\{\text{P}(\text{S})\text{Ph}_2\}^{[2]}$  and  $\text{K}(\text{CH}_2\text{C}_6\text{H}_5)$  in toluene. Single crystals suitable for X-ray diffraction analyses were grown by slow evaporation of a saturated solution of  $\text{HC}(\text{PPh}_3)\{\text{P}(\text{S})\text{Ph}_2\}$  in cyclohexane. Single crystals of  $[\text{K}[\text{C}(\text{PPh}_3)\{\text{P}(\text{S})\text{Ph}_2\}]] \cdot (18\text{-crown-6})$  suitable for X-ray diffraction analyses were grown for a saturated solution of  $[\text{K}[\text{C}(\text{PPh}_3)\{\text{P}(\text{S})\text{Ph}_2\}]]$  and 1 eq of 18-crown-6 in THF. Benzene- $d_6$  was dried over molecular sieves and degassed with three freeze-pump-thaw cycles. All  $^1\text{H}$  and  $^{13}\text{C}$  NMR spectrum were collected either on Bruker Avance III 500 or 600 MHz spectrometer.  $^{31}\text{P}$  NMR spectrum were collected on Bruker AVII+ 300MHz spectrometer.  $^1\text{H}$  and  $^{13}\text{C}$  NMR chemical shifts were reported referenced internally to the residual solvent peak at 7.16 ppm ( $\text{C}_6\text{D}_6$ ) and 128.06 ( $\text{C}_6\text{D}_6$ ).  $^{31}\text{P}$  NMR chemical shifts were reported referenced externally to  $\text{H}_3\text{PO}_4$  at 0 ppm. All heteronuclear NMR spectra were recorded proton decoupled. Infrared spectra were recorded as KBr pellets on a Perkin-Elmer Spectrum One FT-IR spectrometer. Elemental analysis was performed on a Carlo Erba 1108 elemental analyzer, outfitted with an A/D converter for analysis using Eager Xperience software. SCXRD data were measured on a Bruker SMART diffractometer with an Apex II area detector (Bruker AXS LLC, USA) using Mo  $\text{K}\alpha$  radiation from a sealed source with focusing optics. Collection temperatures were controlled using Cryostream 700 and 800 cryostats (Oxford Cryosystems, UK). Hemispheres of data were collected using strategies of scans about the omega and phi axes. The Bruker Apex3 software suite was used for unit cell determination, data collection, and data reduction.

*Caution!*  $^{232}\text{Th}$  ( $1.41 \times 10^{10}$  a, 4.081 MeV) and  $^{238}\text{U}$  ( $4.47 \times 10^{10}$  a, 4.267 MeV) are alpha emitters, and should be handled with proper radiological controls and safety protocols. Organomercury complexes are highly toxic and must be handled with multiple layers of butyl or nitrile gloves.

### 1.1 Synthesis of $[\text{Hg}(\text{C}(\text{PPh}_3)\{\text{P}(\text{S})\text{Ph}_2\})_2]$

$\text{HgI}_2$  (500 mg, 1.10 mmol) was dissolved in a scintillation vial using 5 mL of THF, producing a colorless solution. This was placed in a freezer at  $-45\text{ }^\circ\text{C}$ . In a separate vial, a suspension of benzyl potassium, (157 mg, 1.21 mmol) in 5 mL of toluene was added to a toluene solution of  $\text{HC}(\text{PPh}_3)\{\text{P}(\text{S})\text{Ph}_2\}$  (542 mg, 1.10 mmol) at room temperature. The deprotonation reaction was allowed to stir for 30 min, and the resultant orange suspension was filtered to yield a light-yellow solution of  $\text{K}[\text{C}(\text{PPh}_3)\{\text{P}(\text{S})\text{Ph}_2\}]$ . This solution was allowed to cool for 15 minutes at  $-45\text{ }^\circ\text{C}$ . After this, the mercuric iodide solution was added dropwise over the course of 10 minutes with vigorous stirring. After 30 min, the solution produced a suspended precipitate. The reaction was allowed to stir for 1 hour and subsequently filtered through Celite, yielding a pale-yellow solution. Solvent was removed *in vacuo* and was replaced with a minimal amount of toluene. X-ray quality crystals were obtained overnight after storing at  $-25\text{ }^\circ\text{C}$ . 937 mg, 72%.

**$^1\text{H}$  NMR (600 MHz, THF-*d*<sub>8</sub>, 300 K):**  $\delta$  7.07 – 7.15 (m, 6H,  $\text{PPh}_3H_{\text{Ph},\text{meta}}$ ), 7.18 – 7.25 (m, 12H,  $\text{PPh}_3H_{\text{Ph},\text{para},\text{meta}}$ ), 7.32 – 7.38 (m, 10H  $\text{SPPH}_2H_{\text{Ph},\text{para}}$ ,  $\text{PPh}_3H_{\text{Ph},\text{ortho}}$ ), 7.37 – 7.42 (m, 4H,  $\text{SPPH}_2H_{\text{Ph},\text{meta}}$ ), 7.43 – 7.49 (m, 4H,  $\text{SPPH}_2H_{\text{Ph},\text{meta}}$ ), 7.62 – 7.75 (m, 10H,  $\text{SPPH}_2H_{\text{Ph},\text{ortho}}$ ,  $\text{PPh}_3H_{\text{Ph},\text{ortho}}$ ), 7.81 – 7.95 (m, 4H,  $\text{SPPH}_2H_{\text{Ph},\text{ortho}}$ ) ppm.  **$^{13}\text{C}\{^1\text{H}\}$  NMR (150 MHz, THF-*d*<sub>8</sub>, 300 K):**  $\delta$  43.94 (m, PCP), 128.14 (d,  $^3J_{\text{CP}} = 11.5\text{ Hz}$ ,  $\text{SPPH}_2\text{CH}_{\text{Ph},\text{meta}}$ ), 128.24 (d,  $^3J_{\text{CP}} = 12.1\text{ Hz}$ ,  $\text{SPPH}_2\text{CH}_{\text{Ph},\text{meta}}$ ), 128.88 (d,  $^3J_{\text{CP}} = 11.8\text{ Hz}$ ,  $\text{PPh}_3\text{CH}_{\text{Ph},\text{meta}}$ ), 129.12 (d,  $^3J_{\text{CP}} = 12.3\text{ Hz}$ ,  $\text{PPh}_3\text{CH}_{\text{Ph},\text{meta}}$ ), 129.76 (d,  $^4J_{\text{CP}} = 2.9\text{ Hz}$ ,  $\text{SPPH}_2\text{CH}_{\text{Ph},\text{para}}$ ), 129.83 (d,  $^4J_{\text{CP}} = 2.8\text{ Hz}$ ,  $\text{SPPH}_2\text{CH}_{\text{Ph},\text{para}}$ ), 131.75 (d,  $^2J_{\text{CP}} = 10.7\text{ Hz}$ ,  $\text{SPPH}_2\text{CH}_{\text{Ph},\text{ortho}}$ ), 131.82 (d,  $^4J_{\text{CP}} = 2.8\text{ Hz}$ ,  $\text{PPh}_3\text{CH}_{\text{Ph},\text{para}}$ ), 132.27 (d,  $^4J_{\text{CP}} = 3.1\text{ Hz}$ ,  $\text{PPh}_3\text{CH}_{\text{Ph},\text{para}}$ ), 132.47 (d,  $^2J_{\text{CP}} = 10.4\text{ Hz}$ ,  $\text{SPPH}_2\text{CH}_{\text{Ph},\text{ortho}}$ ), 134.54 (d,  $^2J_{\text{CP}} = 10.3\text{ Hz}$ ,  $\text{PPh}_3\text{CH}_{\text{Ph},\text{ortho}}$ ), 134.82 (d,  $^2J_{\text{CP}} = 9.5\text{ Hz}$ ,  $\text{PPh}_3\text{CH}_{\text{Ph},\text{ortho}}$ ) ppm.  **$^{31}\text{P}\{^1\text{H}\}$  NMR (120 MHz, THF-*d*<sub>8</sub>, 298 K):**  $\delta$  21.82 (d,  $^2J_{\text{PP}} = 19.8\text{ Hz}$ ,  $\text{PPh}_3$ ), 43.61 (d,  $^2J_{\text{PP}} = 19.8\text{ Hz}$ ,  $\text{SPPH}_2$ ). **IR (KBr,  $\text{cm}^{-1}$ ):** 3450 (w), 3052 (m), 1486 (m), 1436 (s), 1390 (w), 1309 (w), 1097 (s), 1044 (s), 1313 (w), 966 (m), 854 (s), 746 (s), 691 (s), 638 (m), 505 (s).

The ipso carbon atoms as well as the central bridging carbon could not be resolved in the regular  $^{13}\text{C}\{^1\text{H}\}$  NMR spectrum. The bridging carbon was subsequently detected through  $^{13}\text{C}\{^1\text{H}\}$  NMR spectroscopy on **1** with a  $^{13}\text{C}$  labelled ylidic carbon atom. For the labelled species, the  $^{13}\text{C}\{^1\text{H}\}$  NMR signal of the central carbon atom appears as a multiplet at 43.9 ppm. The signals in the  $^{31}\text{P}\{^1\text{H}\}$  NMR spectrum show the expected splitting to a doublet of doublets, because of the additional coupling with the  $^{13}\text{C}$  enriched C1 atom. While the  $^2J_{\text{PP}}$  coupling amounts to 19.9 Hz, the  $^1J_{\text{PC}}$  couplings are measured to be 67.1 (P(S) signal) and 79.4 Hz ( $\text{PPh}_3$  group), respectively.

# Supporting Information

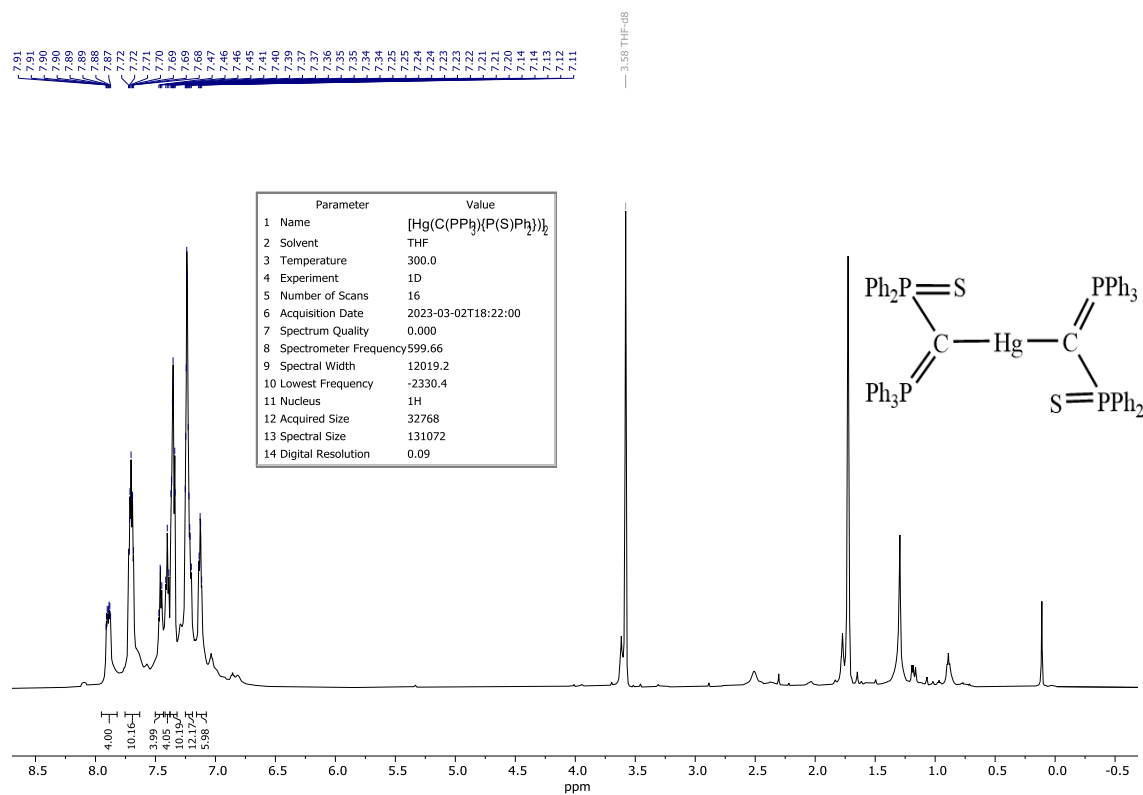

**Figure S1:** <sup>1</sup>H NMR (600 MHz, THF-d<sub>8</sub>, 300 K): spectrum of [Hg(C(PPh<sub>3</sub>){P(S)Ph<sub>2</sub>)}<sub>2</sub>].

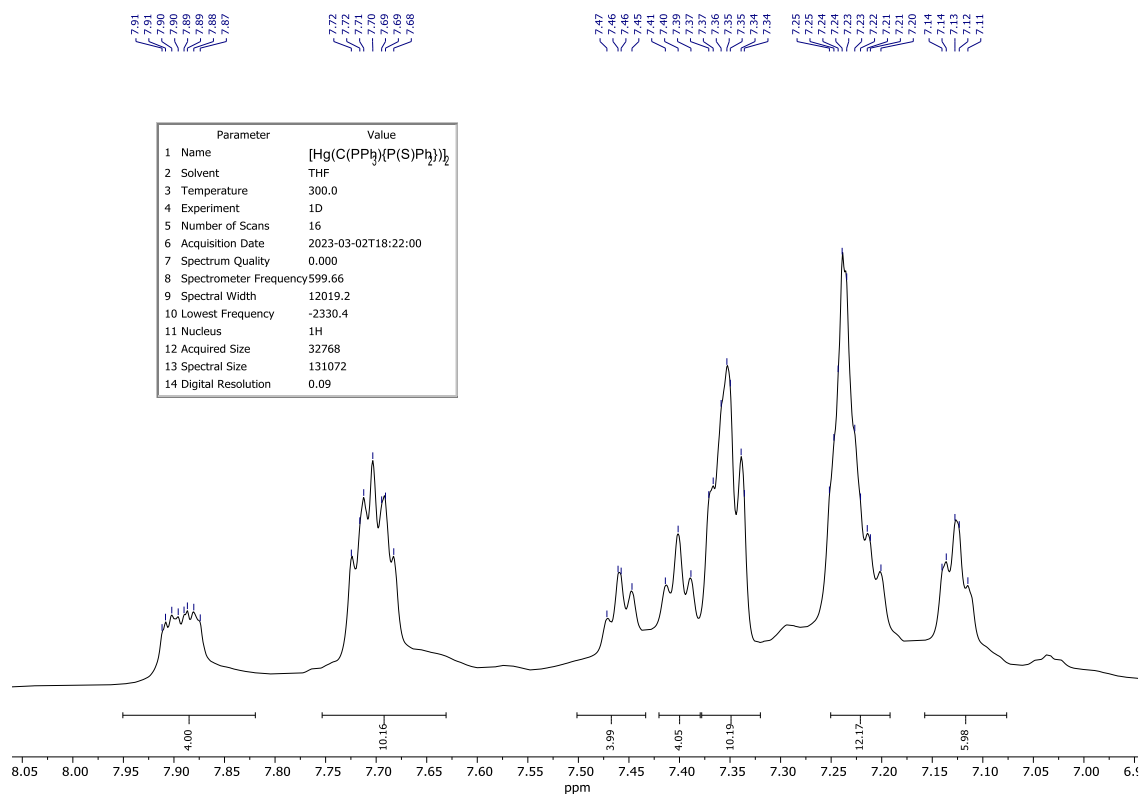

**Figure S2:** Aryl region of <sup>1</sup>H NMR (600 MHz, THF-d<sub>8</sub>, 300 K) spectrum of [Hg(C(PPh<sub>3</sub>){P(S)Ph<sub>2</sub>)}<sub>2</sub>].

# Supporting Information

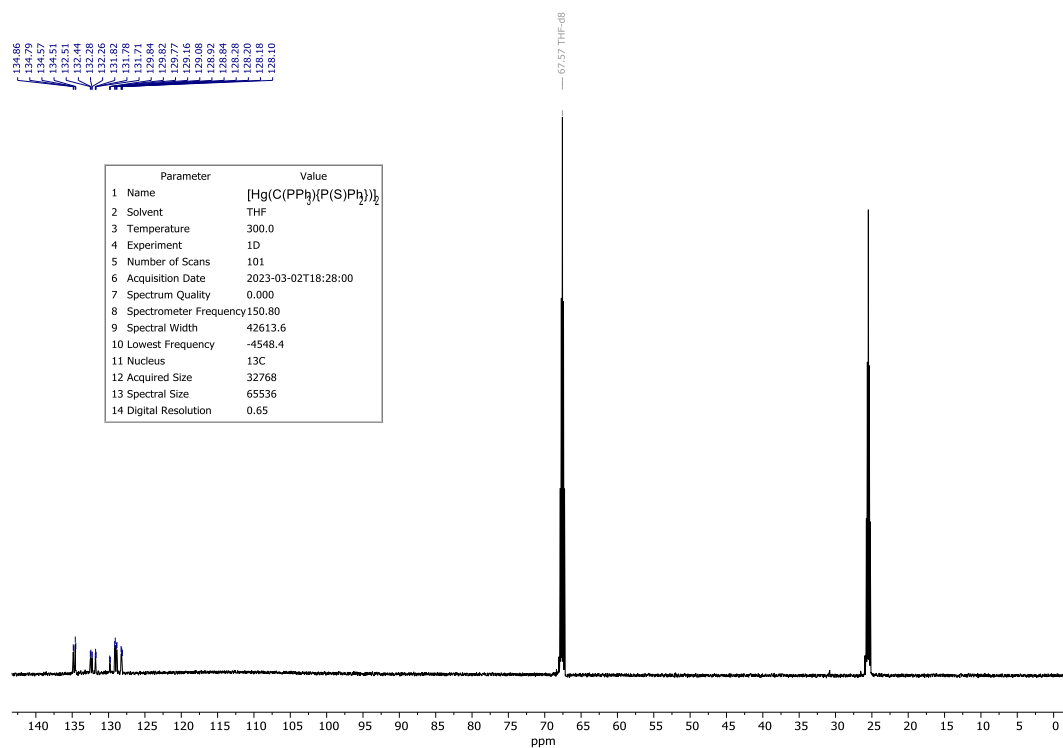

**Figure S3:**  $^{13}\text{C}\{^1\text{H}\}$  (150 MHz, THF- $d_8$ , 300 K) spectrum of [Hg(C(PPh<sub>3</sub>){P(S)Ph<sub>2</sub>})<sub>2</sub>].

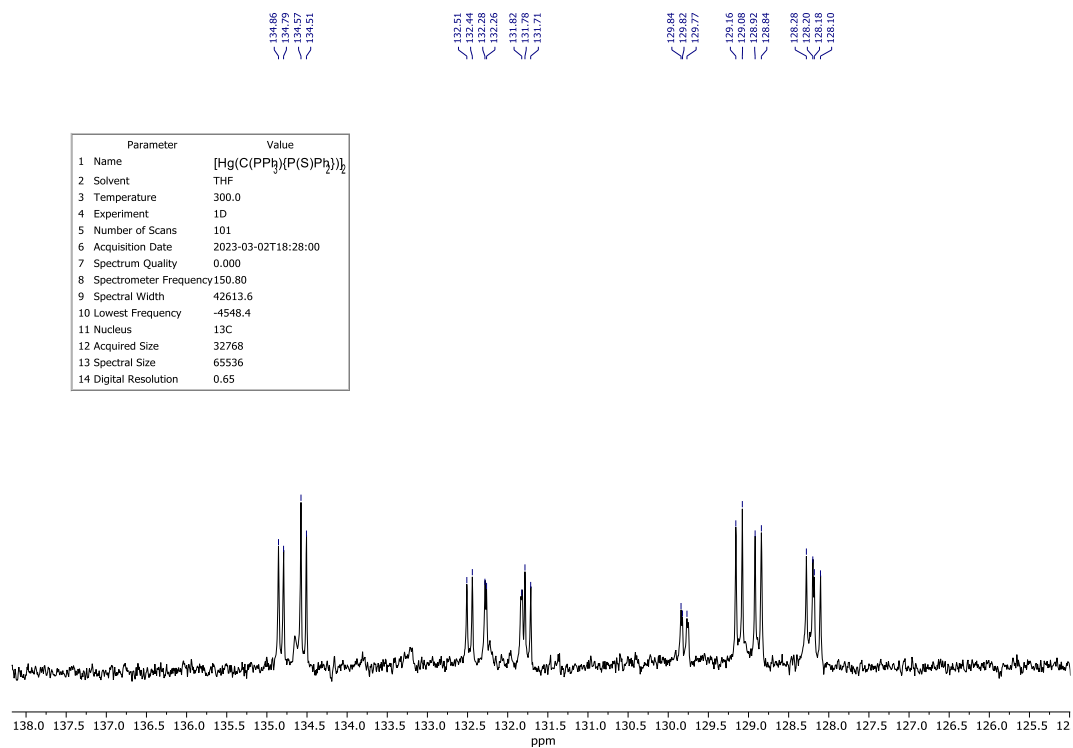

**Figure S4:** Aryl region of  $^{13}\text{C}\{^1\text{H}\}$  (150 MHz, THF- $d_8$ , 300 K) spectrum of [Hg(C(PPh<sub>3</sub>){P(S)Ph<sub>2</sub>})<sub>2</sub>].

## Supporting Information

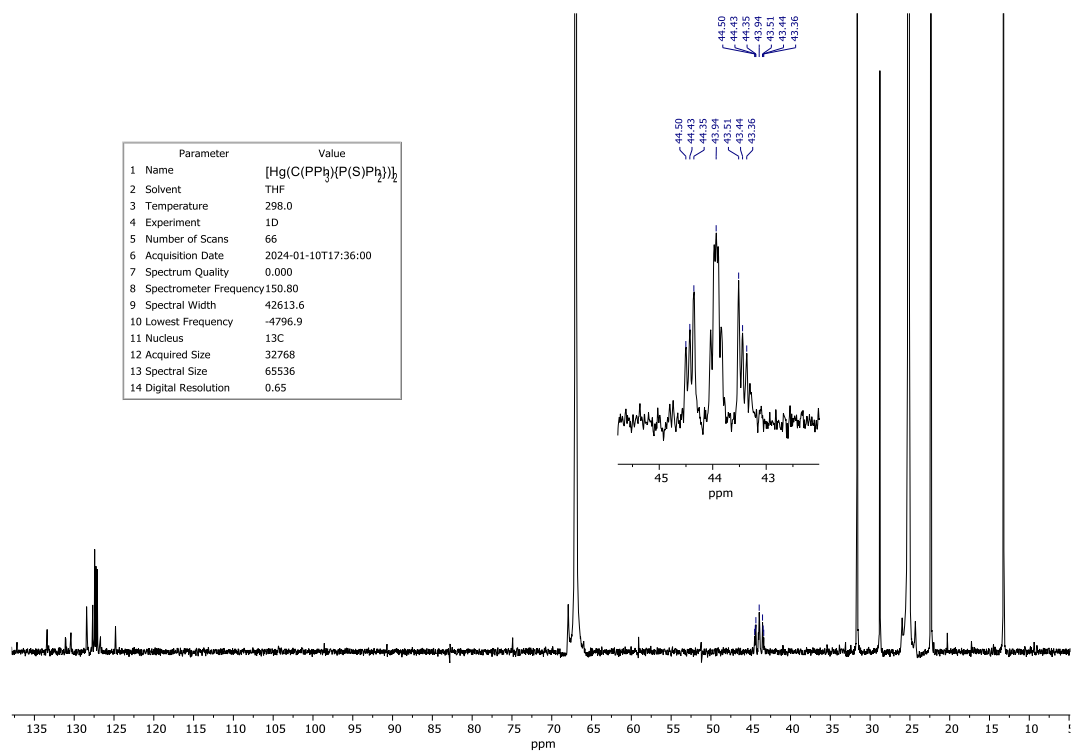

**Figure S5:**  $^{13}\text{C}\{^1\text{H}\}$  (150 MHz, THF, 298 K) spectrum of  $^{13}\text{C}$ -labeled  $[\text{Hg}(\text{C}(\text{PPh}_3)\{\text{P}(\text{S})\text{Ph}_2\})_2]$ . The sample was only prepared on a milligram scale and not fully purified, but only used for detection of the ylidic carbon atom.

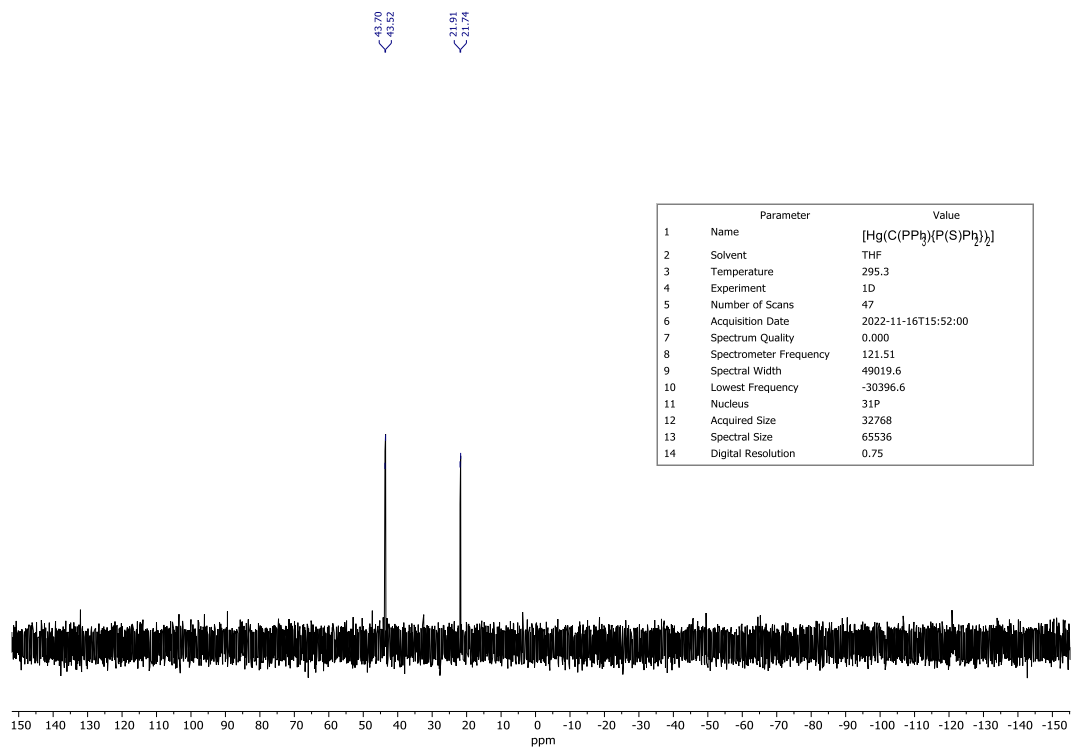

**Figure S6:**  $^{31}\text{P}\{^1\text{H}\}$  NMR (120 MHz, THF-*d*<sub>8</sub>, 298 K) spectrum of  $[\text{Hg}(\text{C}(\text{PPh}_3)\{\text{P}(\text{S})\text{Ph}_2\})_2]$ .

## Supporting Information

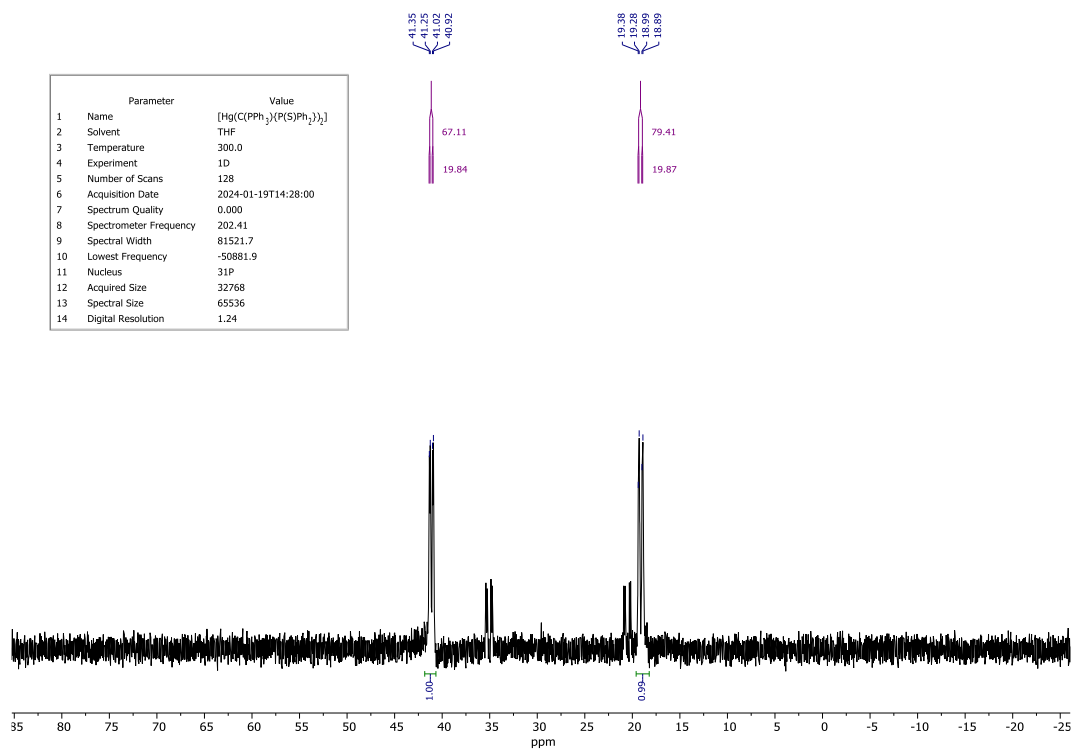

**Figure S7:**  $^{31}\text{P}\{^1\text{H}\}$  NMR (120 MHz, THF- $d_8$ , 298 K) spectrum of  $^{13}\text{C}$ -labeled  $[\text{Hg}(\text{C}(\text{PPh}_3)\{\text{P}(\text{S})\text{Ph}_2\})_2]$ . The sample was only prepared on a milligram scale and not fully purified, but only used for detection of the ylidic carbon atom. The NMR spectrum thus shows  $^{31}\text{P}\{^1\text{H}\}$  NMR signals of the still present  $^{13}\text{C}$ -labeled ylide ( $\delta = 20.5, 35.1$  ppm).

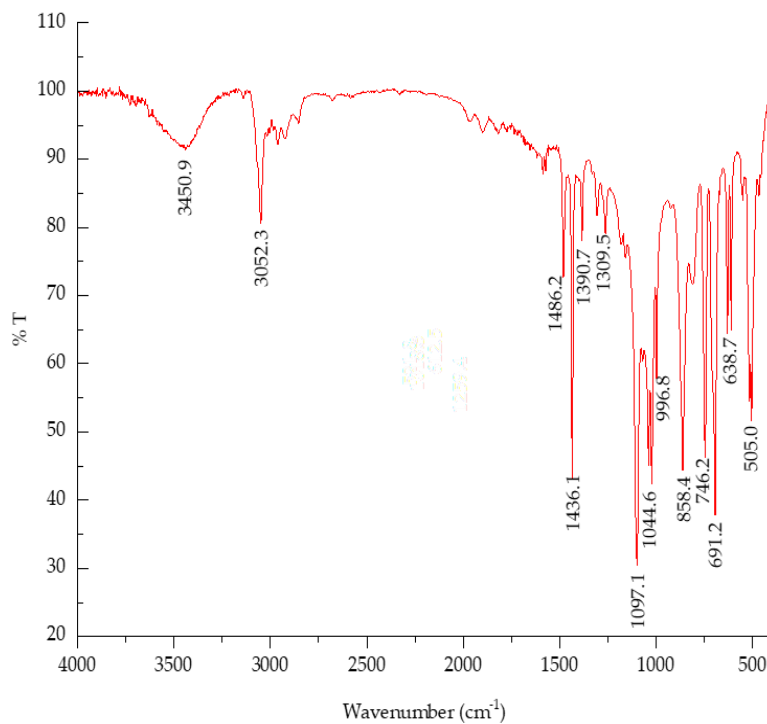

**Figure S8:** FTIR vibrational spectrum of  $[\text{Hg}(\text{C}(\text{PPh}_3)\{\text{P}(\text{S})\text{Ph}_2\})_2]$ .

## 1.2 Synthesis of $[(C_5Me_5)_2Th(\kappa^2-(C,S)-C(PPh_3)\{P(S)Ph_2\})](Cl)$

**Method A:** To a vial containing  $[(C_5Me_5)_2ThCl_2]$  (200 mg, 0.348 mmol), 10 mL of toluene was added, producing an off-white suspension, this was allowed to stir at room temperature for 3h. In a separate vial, a suspension of benzyl potassium, (54 mg, 0.0418 mmol) in 5 mL of toluene was added to a toluene solution of  $HC(PPh_3)\{P(S)Ph_2\}$  (171 mg, 0.348 mmol). The deprotonation reaction was allowed to stir for 30 min, and the resultant orange suspension was filtered through Celite to yield a pale-yellow solution of  $K(CH_2C_6H_5)$ . This solution was then added dropwise to the suspension of  $[(C_5Me_5)_2ThCl_2]$  and allowed to stir for 4 hr. The resultant off-white solution was filtered through Celite, and solvent was removed under reduced pressure. Colorless crystals were obtained from a slow vapor diffusion of *n*-pentane into THF at RT over the course of two days, 97 mg, 28%<sup>i</sup>.

**Method B:** A scintillation vial was charged with 10 mL of toluene and  $[(C_5Me_5)_2ThCl_2]$  (83 mg, 0.144 mmol) To this stirring suspension, a colorless THF solution of  $[Hg(C(PPh_3)\{P(S)Ph_2\})_2]$  (85 mg, 0.072 mmol) was added dropwise over the course of 5 min, immediately producing a yellow solution and causing the suspended  $(C_5Me_5)_2ThCl_2$  to visibly become solubilized. This reaction was allowed to stir for 4 hr, after which, a fine white precipitate had formed. The contents of the scintillation vial were filtered through Celite, and solvent was subsequently removed to yield an off-white powder. Colorless crystals were obtained from a slow vapor diffusion of *n*-pentane into THF at RT over the course of two days, 51 mg, 36%<sup>i</sup>.

**<sup>1</sup>H NMR (300 MHz, THF-*d*<sub>8</sub>, 297 K):**  $\delta$  1.94 (s, 30H,  $C_5(CH_3)_5$ ), 7.03 – 7.29 (m, 10 H), 7.30 – 7.51 (m, 15H) ppm. **<sup>13</sup>C{<sup>1</sup>H} NMR (150 MHz, C<sub>6</sub>D<sub>6</sub>, 300 K):**  $\delta$  13.3 ( $CH_3$ ,  $C_5Me_5$ ), 41.96 (PCP, dd,  $J_{CP} = 38.24$ , 16.52), 125.7 (s,  $C_5Me_5$ ), 127.9 (d,  $^3J_{CP} = 11.9$  Hz,  $SPPH_2CH_{Ph,meta}$ ), 128.4 (d,  $^3J_{CP} = 11.7$  Hz,  $PPh_3CH_{Ph,meta}$ ), 130.4 (s,  $SPPH_3CH_{Ph,para}$ ), 131.3 (s,  $PPh_3CH_{Ph,para}$ ), 133.4 (d,  $^2J_{CP} = 11.6$ ,  $SPPH_2CH_{Ph,ortho}$ ), 134.8 (dd,  $^1,^3J_{CP} = 84.6 + 8.1$  Hz,  $SPPH_2CH_{Ph,ipso}$ ), 135.6 (d,  $^2J_{CP} = 9.8$  Hz,  $PPh_3CH_{Ph,ortho}$ ), 142.9 (d,  $^1J_{CP} = 73.5$  Hz  $PPh_3CH_{Ph,ipso}$ ) ppm. **<sup>31</sup>P{<sup>1</sup>H} NMR (120 MHz, THF-*d*<sub>8</sub>, 297 K):**  $\delta$  9.45 (d,  $^2J_{PP} = 8.1$  Hz,  $PPh_3$ ) 20.47 (d,  $^2J_{PP} = 8.2$  Hz,  $SPPH_3$ ). **FT-IR (KBr,  $cm^{-1}$ ):** 3053 (w), 2901 (m), 2859 (m), 2244 (w), 2082 (w), 1488 (m), 1435 (s), 1376 (m), 1313 (w), 1106 (s), 1074 (s), 1023 (w), 767 (s), 692 (m), 591 (m), 522 (m). **Anal. Calcd. (found) for  $C_{51}H_{55}P_2SClTh$ :** C, 61.65 (62.12%); H, 5.58 (5.10%); S, 3.23 (3.58%).

The central bridging carbon could not be resolved in the regular  $^{13}C\{^1H\}$  NMR spectrum, but could be detected through  $^{13}C\{^1H\}$  NMR spectroscopy on **2** with a  $^{13}C$ -labelled ylidic carbon atom (Figure S12). The  $^{13}C$  signal of this atom appears as doublet of doublets at 42.0 ppm with  $^1J_{PC}$  coupling constants of 16.5 and 38.2 Hz, respectively. These coupling patterns could be confirmed in the  $^{31}P\{^1H\}$  NMR spectrum of the labelled compound, which shows the expected splitting and with the coupling constants already observed in the  $^{13}C\{^1H\}$  NMR spectrum (Figure S14).

<sup>i</sup> Note that the NMR spectrum of the complex repeatedly showed large amounts (e.g. four equivalents in Figure S9) of residual toluene, which we were not able to remove under vacuum. Therefore the isolated yield of the complex might be even lower than indicated herein.



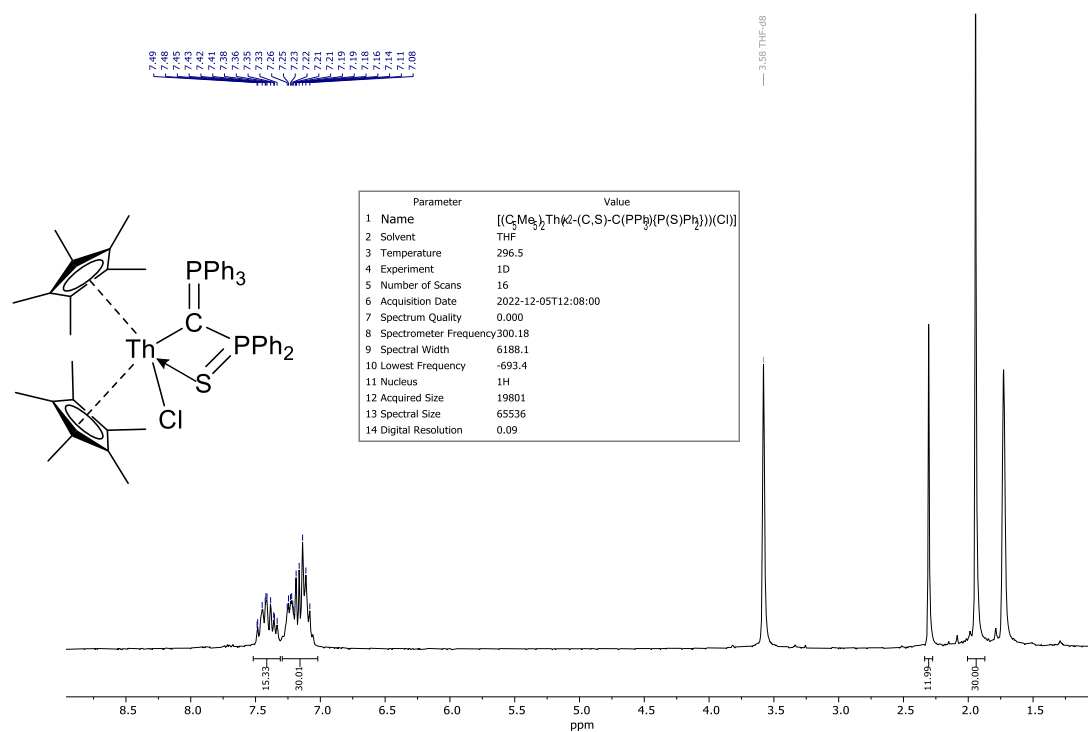

**Figure S9:**  $^1H$  NMR (300 MHz, THF- $d_8$ , 297 K) spectrum of  $[(C_5Me_5)_2Th(\kappa^2-(C,S)-C(PPh_3)\{P(S)Ph_2\})](Cl)]$ . The  $^1H$  NMR spectrum shows residues of toluene ( $\delta = 2.3 + 7.0 - 7.2$  ppm). The integration of the aromatic region in the  $^1H$  NMR spectrum reveals the anticipated 25 H signals, along with 20 H signals from toluene, corresponding to the signal intensity of the associated methyl group at 2.3 ppm.

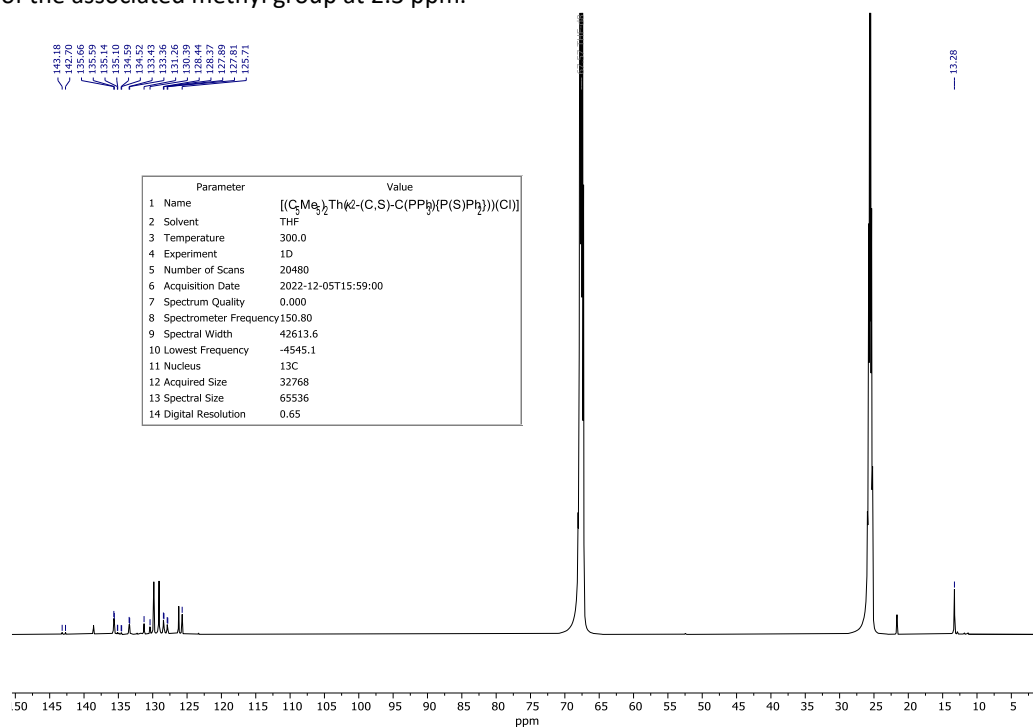

**Figure S10:**  $^{13}C\{^1H\}$  (150 MHz, THF- $d_8$ , 300 K): spectrum of  $[(C_5Me_5)_2Th(\kappa^2-(C,S)-C(PPh_3)\{P(S)Ph_2\})](Cl)]$ . The  $^{13}C\{^1H\}$  NMR spectrum shows residues of toluene ( $\delta = 21.3, 125.9, 128.7, 129.5, 138.2$  ppm).

# Supporting Information

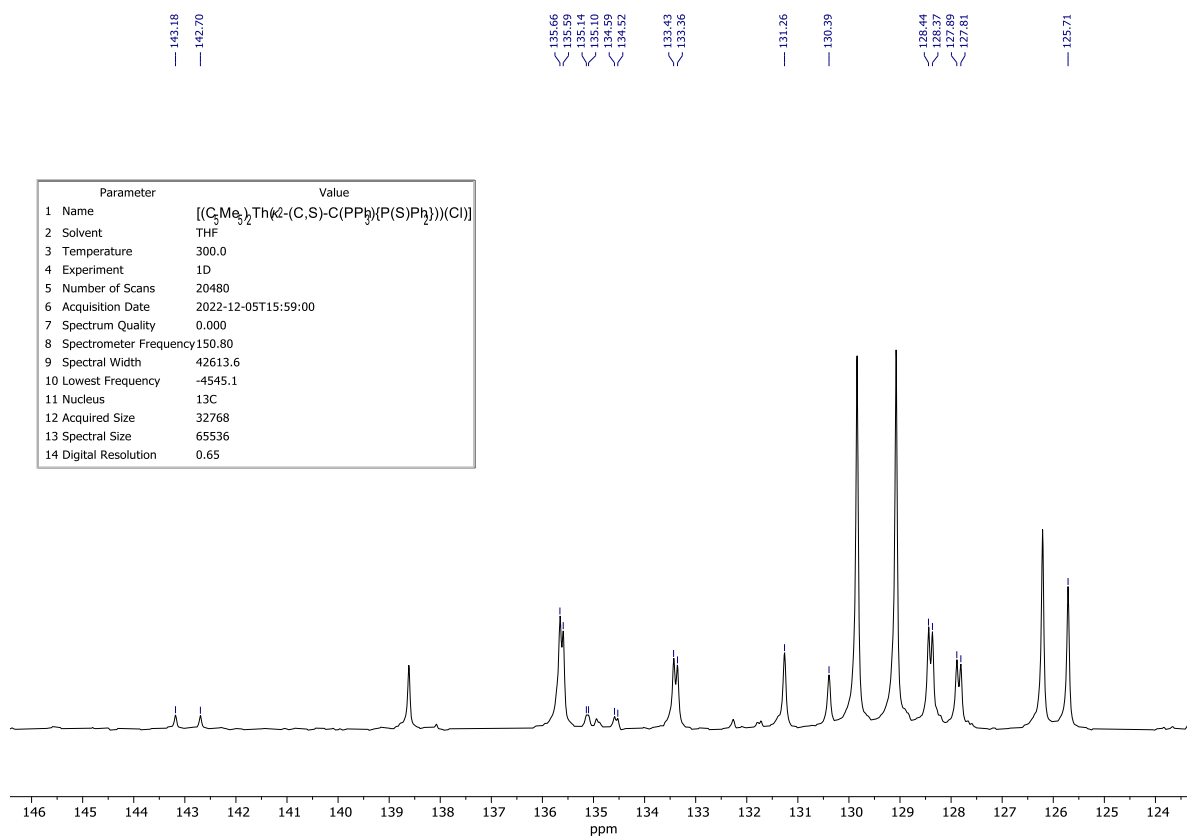

**Figure S11:** Aryl region of  $^{13}C\{^1H\}$  (150 MHz, THF- $d_8$ , 300 K): spectrum of  $[(C_5Me_5)_2Th(\kappa^2-(C,S)-C(PPh_3)\{P(S)Ph_2\})](Cl)]$ .

## Supporting Information

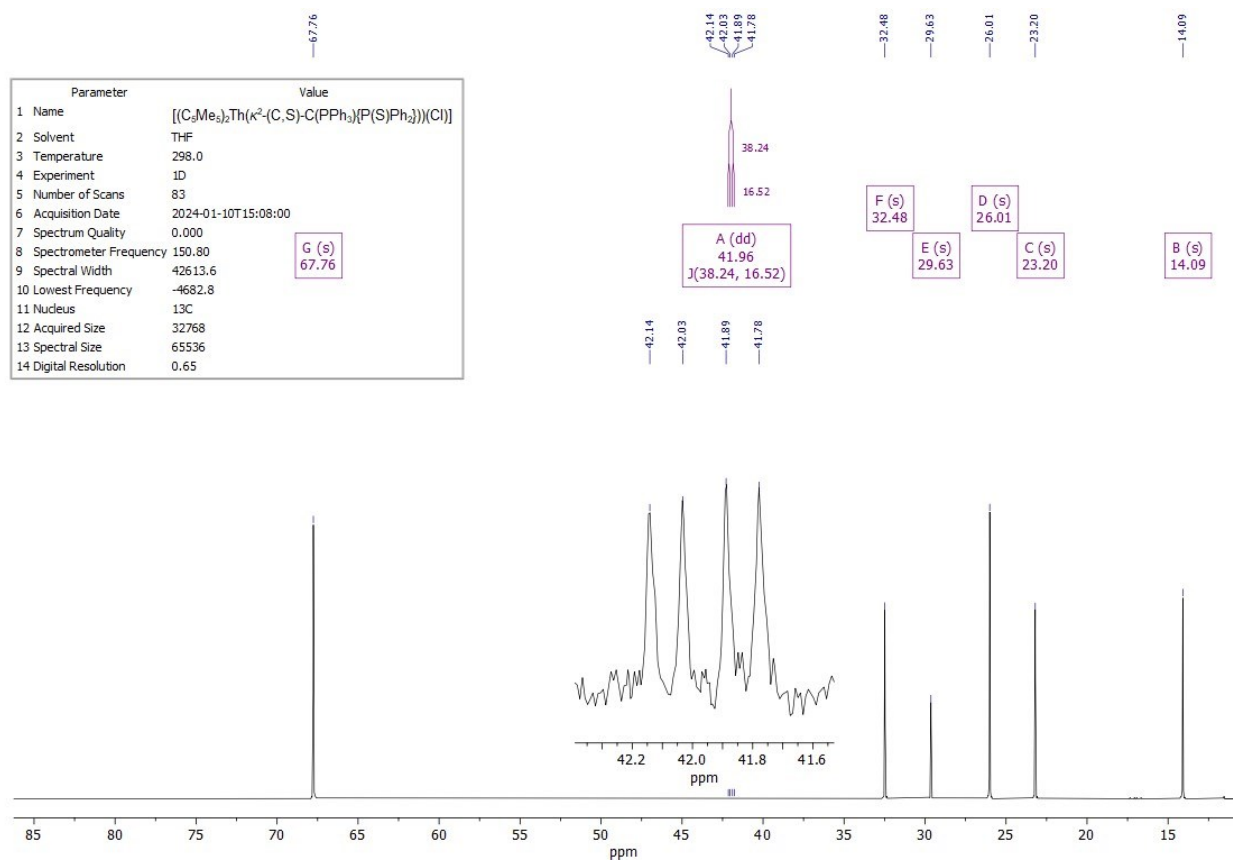

**Figure S12:**  $^{13}C\{^1H\}$  (150 MHz, THF, 298 K): Aliphatic region of  $^{13}C$ -labeled  $[(C_5Me_5)_2Th(\kappa^2-(C,S)-C(PPh_3)\{P(S)Ph_2\})\{Cl\})]$ . Peaks at 26.0 and 67.8 ppm correspond to non-deuterated THF, peaks at 14.1, 23.2, 29.6 and 32.5 to *n*-heptane. The sample was only prepared on a milligram scale and not fully purified, but only used for detection of the ylidic carbon atom.

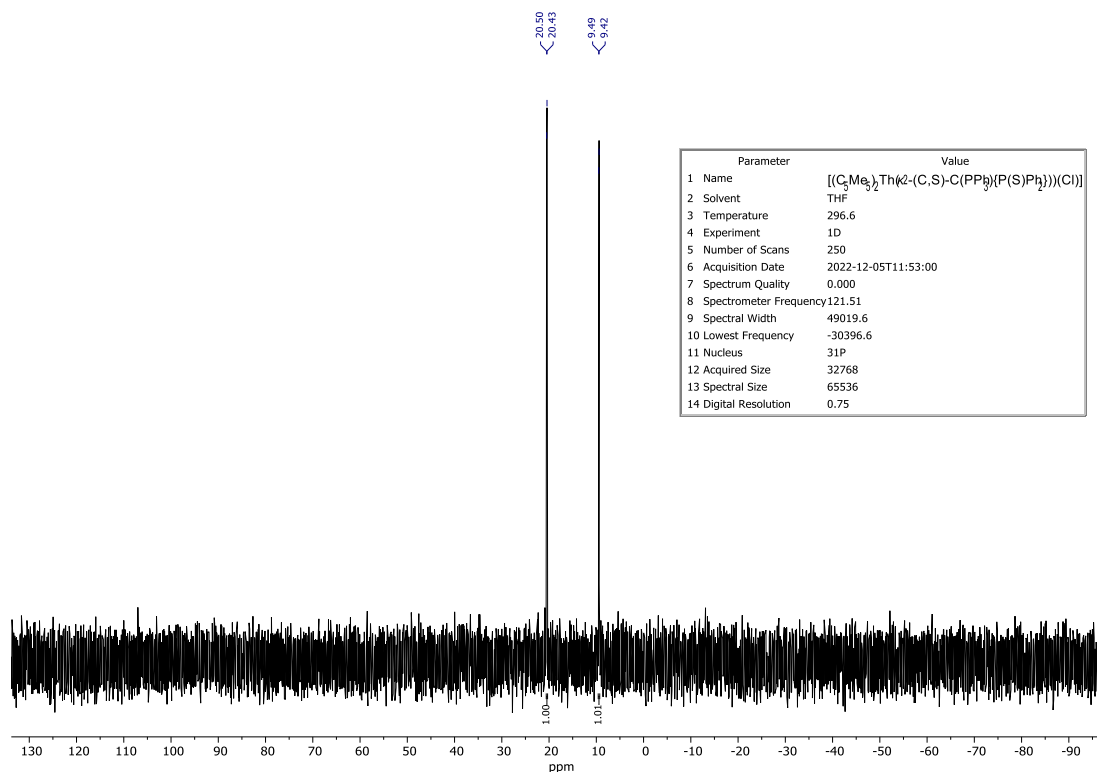

**Figure S13:**  $^{31}\text{P}\{^1\text{H}\}$  (120 MHz, THF- $d_8$ , 297 K) NMR spectrum of [(C5Me5)2Th(k2-(C,S)-C(PPh3){P(S)Ph2})(Cl)].

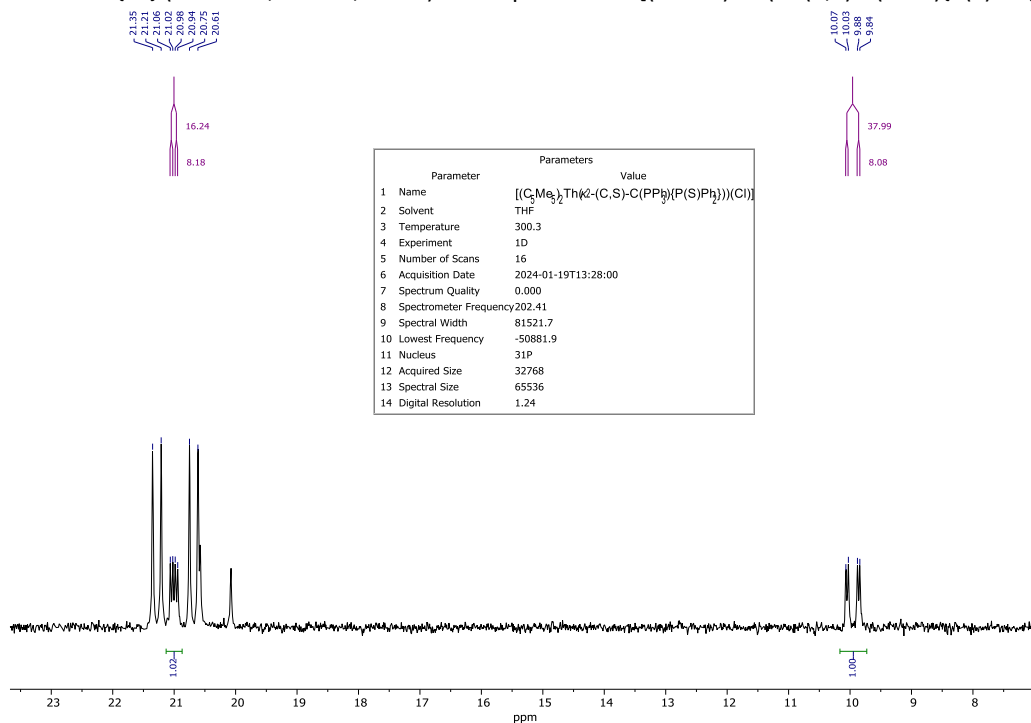

**Figure S14:**  $^{31}\text{P}\{^1\text{H}\}$  (200 MHz, THF- $d_8$ , 297 K) NMR spectrum of the  $^{13}\text{C}$ -labeled [(C5Me5)2Th(k2-(C,S)-C(PPh3){P(S)Ph2})(Cl)]. The sample was only prepared on a milligram scale and not fully purified, but only used for detection of the ylidic carbon atom. Therefore, the spectrum shows  $^{31}\text{P}\{^1\text{H}\}$  NMR signals of the still present  $^{13}\text{C}$ -labeled ylide [ $\delta = 20.98$  (dd,  $^1J_{\text{CP}} = 121.3$  Hz +  $^2J_{\text{PP}} = 28.0$  Hz) ppm] along with the signals at 9.95 and 21.0 ppm for thorium complex **3**.

## Supporting Information

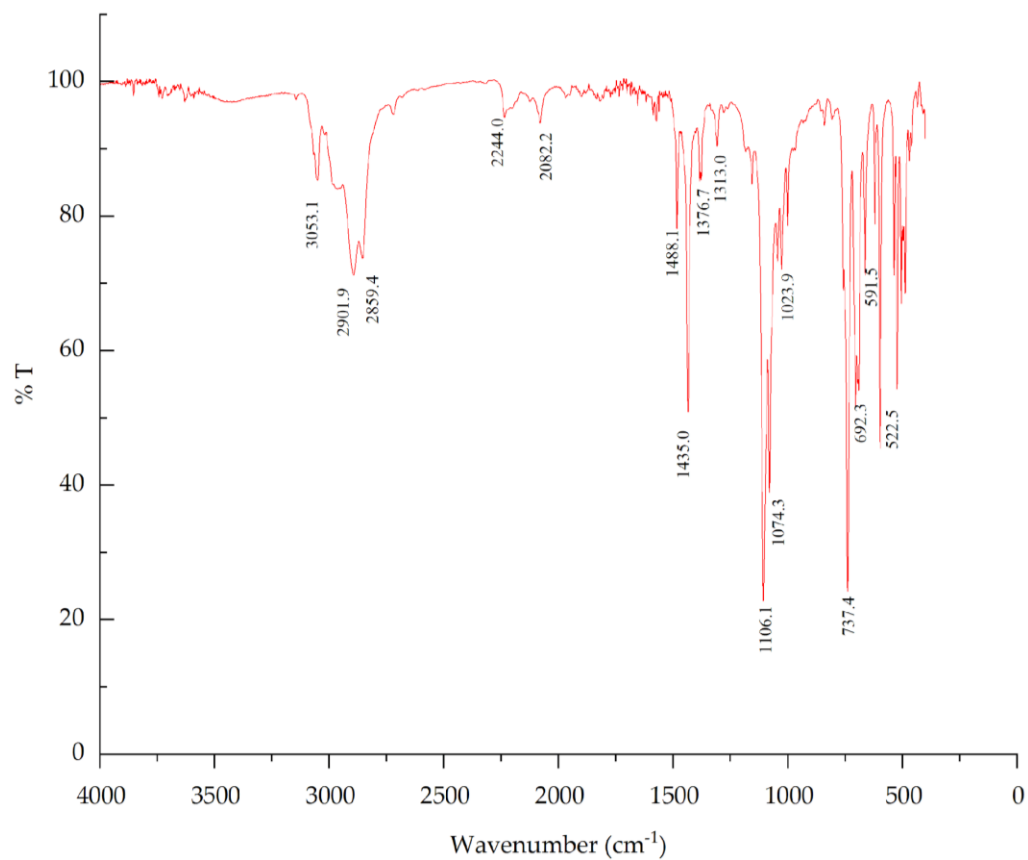

**Figure S15:** FTIR vibrational spectrum of  $[(C_5Me_5)_2Th(\kappa^2-(C,S)-C(PPh_3)\{P(S)Ph_2\})](Cl)]$ .

### 1.3 Synthesis of $[(C_5Me_5)_2U(\kappa^2-(C,S)-C(PPh_3)\{P(S)Ph_2\})](Cl)$

**Method A:** To a vial containing  $[(C_5Me_5)_2UCl_2]$  (152 mg, 0.262 mmol), ca. 10 mL of toluene was added, producing a dark red solution, this was allowed to stir at RT. In a separate vial, a suspension of benzyl potassium, (37 mg, 0.0288 mmol) in 5 mL of toluene, was added to a toluene solution of  $HC(PPh_3)\{P(S)Ph_2\}$  (129 mg, 0.262 mmol). The deprotonation reaction was allowed to stir for 30 min, and the resultant orange suspension was filtered to yield a light-yellow solution of  $K[C(PPh_3)\{P(S)Ph_2\}]$ . This solution was then added dropwise to the solution of  $[(C_5Me_5)_2UCl_2]$  and allowed to stir for 4 hr, resulting in a slow color change from red to light orange. The solution was filtered through Celite and solvent was removed under reduced pressure. The resulting powder was dissolved in a minimal amount of *n*-pentane. Orange crystals were obtained from a concentrated *n*-pentane solution at  $-45\text{ }^\circ\text{C}$ , 86 mg, 33%.

**Method B:** A scintillation vial was charged with 10 mL of toluene and  $[(C_5Me_5)_2UCl_2]$  (72 mg, 0.124 mmol), producing a dark red solution. To this stirring solution, a colorless THF solution of  $[Hg(C(PPh_3)\{P(S)Ph_2\})_2]$  (146 mg, 0.124 mmol) was added dropwise over the course of 5 min. The solution remained dark red in color with the formation of a flocculent precipitate. This reaction was allowed to stir for 4 hr, after which, a fine white precipitate was obtained, rinsed with toluene and THF and discarded. Solvent was subsequently removed *in vacuo* to yield a reddish orange powder of **4**, 54 mg, 38%.

$^1H$  NMR (600 MHz,  $C_6D_6$ , 298 K)/ $^{13}C\{^1H\}$  NMR (150 MHz,  $C_6D_6$ , 298 K): *The unequivocal assignment of signals in both the  $^1H$  and  $^{13}C\{^1H\}$  NMR spectra was not feasible due to the paramagnetic properties of the compound.*

$^{31}P\{^1H\}$  NMR (120 MHz,  $C_6D_6$ , 298 K):  $\delta$  -47.68, -506.90 FT-IR (KBr,  $cm^{-1}$ ): 3067.6 (m), 2909.5 (m), 2852.8 (w), 1477.1 (w), 1432.4 (s), 1375.7 (s), 1175.7 (m), 1101.1 (s), 1023.5 (s), 996.8 (s), 811.7 (w), 737.1 (s), 686.3 (m), 593.8 (m), 522.2 (m). **Anal. Calcd. (found) for  $C_{51}H_{55}P_2SCIU$ :** C, 59.16 (59.07%); H, 5.35 (5.58%).

#### Comparison method A and B

Salt metathesis with **2** showed similar success to salt metathesis using the potassium compound **1-K**. However, the mercury transmetalation may prove ideal when moving to oxidation states that are less stable such as U(VI) where reduction to U(V) is often observed with alkali metal salts.<sup>18</sup>

# Supporting Information

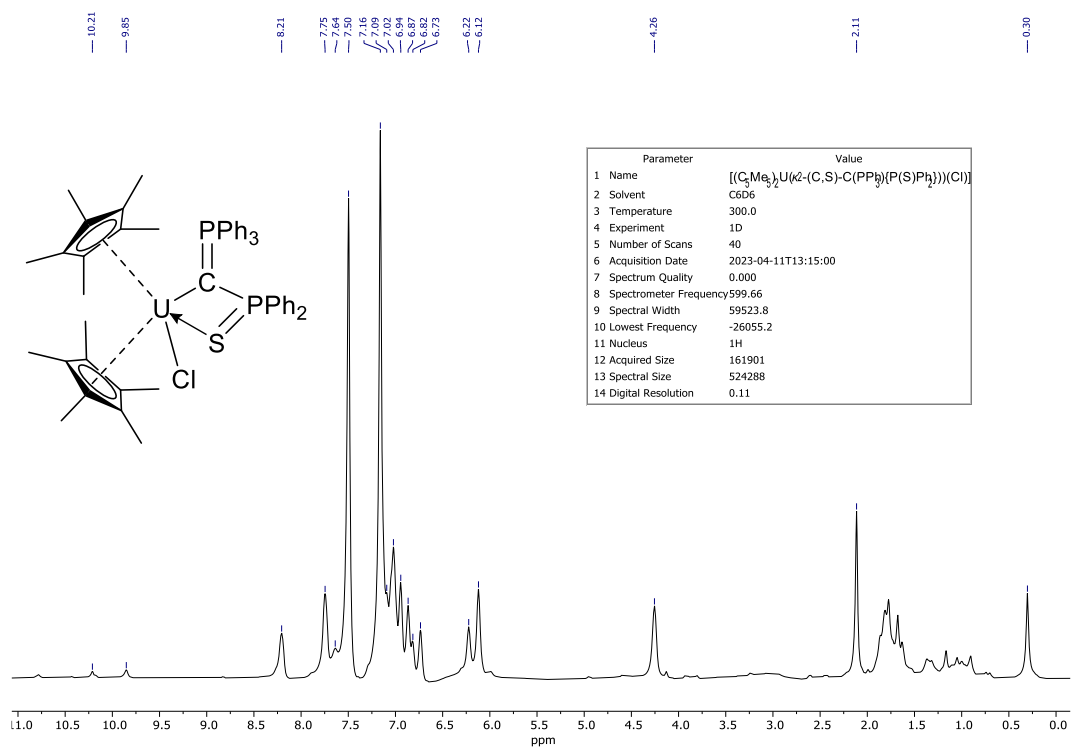

**Figure S16:** <sup>1</sup>H NMR spectrum (600 MHz, C<sub>6</sub>D<sub>6</sub>, 298 K) of  $[(C_5Me_5)_2U(\kappa^2-(C,S)-C(PPh_3)\{P(S)Ph_2\})](Cl)$ .

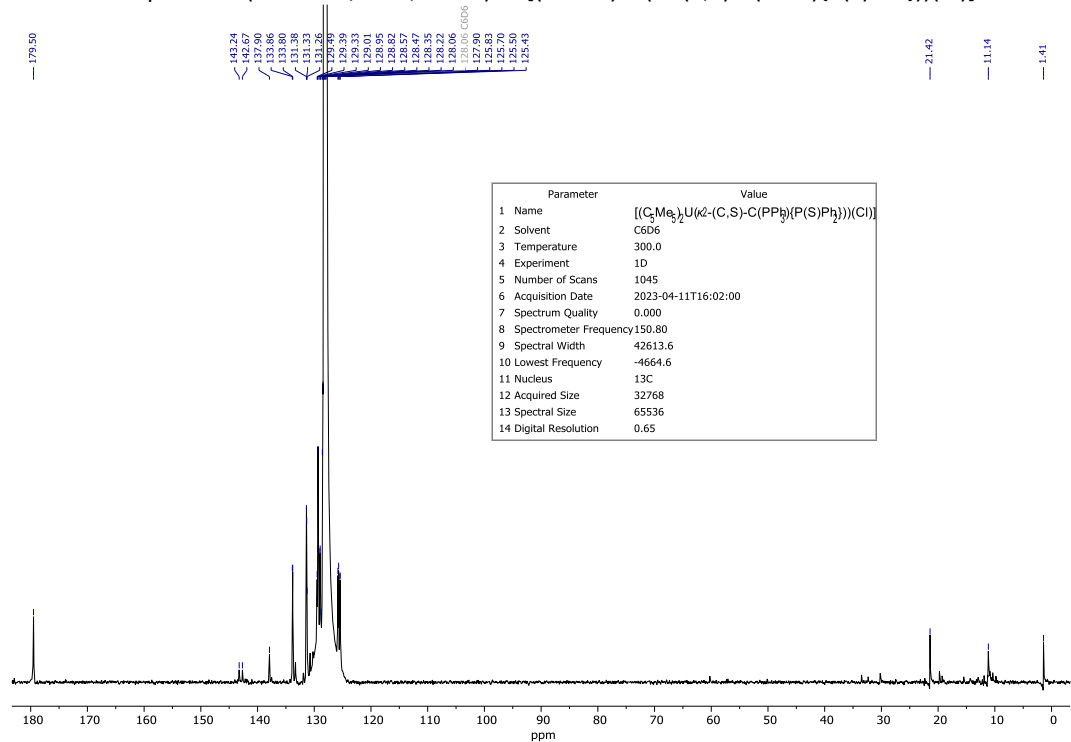

**Figure S17:** <sup>13</sup>C{<sup>1</sup>H} (150 MHz, C<sub>6</sub>D<sub>6</sub>, 298 K) NMR spectrum of  $[(C_5Me_5)_2U(\kappa^2-(C,S)-C(PPh_3)\{P(S)Ph_2\})](Cl)$ .

# Supporting Information

| Parameter                | Value                                                      |
|--------------------------|------------------------------------------------------------|
| 1 Name                   | $[(C_5Me_5)_2U(\kappa^2-(C,S)-C(PPh_3)\{P(S)Ph_2\})](Cl)]$ |
| 2 Solvent                | C6D6                                                       |
| 3 Temperature            | 297.3                                                      |
| 4 Experiment             | 1D                                                         |
| 5 Number of Scans        | 2048                                                       |
| 6 Acquisition Date       | 2022-12-14T09:25:00                                        |
| 7 Spectrum Quality       | 0.000                                                      |
| 8 Spectrometer Frequency | 121.51                                                     |
| 9 Spectral Width         | 178571.4                                                   |
| 10 Lowest Frequency      | -95172.5                                                   |
| 11 Nucleus               | $^{31}P$                                                   |
| 12 Acquired Size         | 119276                                                     |
| 13 Spectral Size         | 262144                                                     |
| 14 Digital Resolution    | 0.68                                                       |

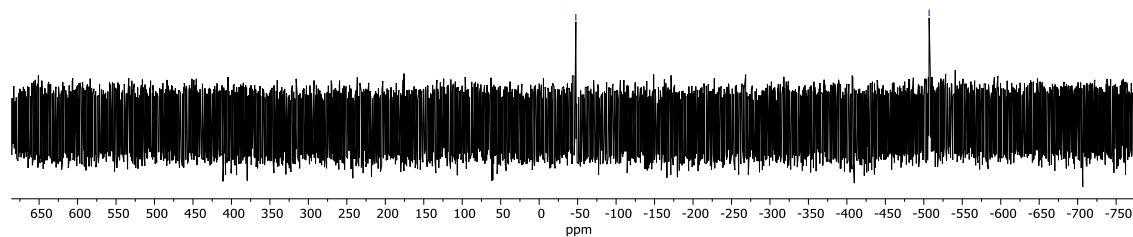

**Figure S18:**  $^{31}P\{^1H\}$  NMR (120 MHz,  $C_6D_6$ , 298 K) spectrum of  $[(C_5Me_5)_2U(\kappa^2-(C,S)-C(PPh_3)\{P(S)Ph_2\})](Cl)$ .

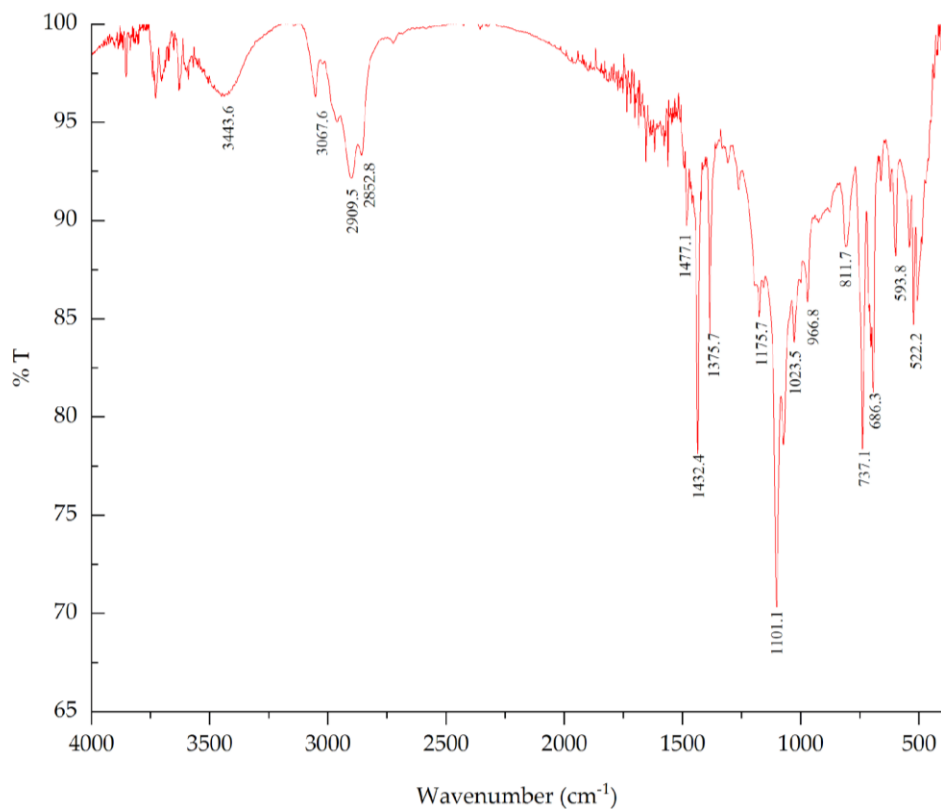

**Figure S19:** FTIR spectrum of  $[(C_5Me_5)_2U(\kappa^2-(C,S)-C(PPh_3)\{P(S)Ph_2\})](Cl)$ .



## 2 Crystal structure determination

### 2.1 General information

Good quality single crystals were hand-picked under polarized optical microscopy in an inert oil such as perfluoropolyalkylether and then mounted on the diffractometer in random orientations. The data collection was done at 100 K. X-ray intensity data measurements of ylide **1-H** and ylide **1-K** were carried out on a Rigaku Synergy instrument ( $\kappa$ -goniometer) with a PILATUS3 R 200K hybrid pixel array detector using  $\text{CuK}\alpha$  (1.54184 Å) radiation monochromated by means of multilayer optics. The X-ray generator was operated at 50 kV and 30 mA. SC-XRD data for complexes **2**, **3** and **4** were measured on a Bruker SMART diffractometer with an Apex II area detector (Bruker AXS LLC, USA) using  $\text{Mo K}\alpha$  radiation from a sealed source with focusing optics. Collection temperatures were controlled using Cryostream 700 and 800 cryostats (Oxford Cryosystems, UK). Hemispheres of data were collected using strategies of scans about the omega and phi axes. The Bruker Apex3 software suite was used for unit cell determination, data collection, and data reduction.

All the structures were solved using direct methods, refined with the Shelx software package and expanded using Fourier techniques.<sup>[4]</sup> Non-hydrogen atoms were refined anisotropically. All hydrogen atoms were inserted at the calculated positions and refined as riding atoms.

Crystallographic data including structure factors have been deposited with the Cambridge Crystallographic Data Centre as supplementary publication no. CCDC-2307044-2307048. Copies of the data can be gained free of charge on application to Cambridge Crystallographic Data Centre, 12 Union Road, Cambridge CB2 1EZ, UK; [fax: (+44) 1223-336-033; email: deposit@ccdc.cam.ac.uk]. An *ORTEP III*<sup>5</sup> view of all compounds were drawn with 50% probability displacement ellipsoids and H atoms omitted for clarity.

**Table S1** Data collection and structure refinement details for compounds **1-H**, **1**, and **2**.

| Compound                                         | 1-H                                              | 1                                                                | 2                                                                 |
|--------------------------------------------------|--------------------------------------------------|------------------------------------------------------------------|-------------------------------------------------------------------|
| Formula                                          | C <sub>31</sub> H <sub>26</sub> P <sub>2</sub> S | C <sub>43</sub> H <sub>49</sub> KO <sub>6</sub> P <sub>2</sub> S | C <sub>66</sub> H <sub>58</sub> OP <sub>4</sub> S <sub>2</sub> Hg |
| CCDC                                             | 2307045                                          | 2307046                                                          | 2307044                                                           |
| Formula weight                                   | 492.52                                           | 794.92                                                           | 1255.71                                                           |
| Temperature [K]                                  | 100(2)                                           | 100(2)                                                           | 173.0                                                             |
| Wave length [Å]                                  | 1.54184                                          | 1.54184                                                          | 1.54184                                                           |
| Crystal system                                   | monoclinic                                       | triclinic                                                        | monoclinic                                                        |
| Space group                                      | <i>P</i> 21/ <i>n</i>                            | <i>P</i> -1                                                      | C2/ <i>c</i>                                                      |
| a [Å]                                            | 9.72967(4)                                       | 9.46920(10)                                                      | 24.571(5)                                                         |
| b [Å]                                            | 15.22975(6)                                      | 10.89450(10)                                                     | 14.090(3)                                                         |
| c [Å]                                            | 16.93649(8)                                      | 21.4146(3)                                                       | 20.038(4)                                                         |
| α [°]                                            | 90                                               | 77.0360(10)                                                      | 90                                                                |
| β [°]                                            | 91.2641(4)                                       | 83.3740(10)                                                      | 122.893(5)                                                        |
| γ [°]                                            | 90                                               | 73.6670(10)                                                      | 90                                                                |
| Volumen [Å <sup>3</sup> ]                        | 2509.046(19)                                     | 2062.75(4)                                                       | 5824.8(19)                                                        |
| Z                                                | 4                                                | 2                                                                | 4                                                                 |
| Calc. density [Mg·m <sup>-3</sup> ]              | 1.304                                            | 1.280                                                            | 1.432                                                             |
| μ (MoKα) [mm <sup>-1</sup> ]                     | 5.812                                            | 2.700                                                            | 2.866                                                             |
| F(000)                                           | 1032                                             | 840                                                              | 2536.0                                                            |
| Crystal dimensions [mm]                          | 0.630 x 0.408 x 0.257                            | 0.175 x 0.115 x 0.092                                            | 0.08 x 0.04 x 0.02                                                |
| Theta range θ [°]                                | 3.904 to 76.807                                  | 4.244 to 67.997                                                  | 3.948 to 52.848                                                   |
| Index ranges                                     | -11 ≤ h ≤ 12<br>-19 ≤ k ≤ 19<br>-21 ≤ l ≤ 21     | -11 ≤ h ≤ 11<br>-13 ≤ k ≤ 13<br>-25 ≤ l ≤ 25                     | -30 ≤ h ≤ 30<br>-17 ≤ k ≤ 17<br>-24 ≤ l ≤ 24                      |
| Reflections collected                            | 74641                                            | 56837                                                            | 57926                                                             |
| Independent reflections                          | 5211 [Rint = 0.0406,<br>Rsigma = 0.0143]         | 7494 [Rint = 0.1110,<br>Rsigma = 0.0504]                         | 5923 [Rint = 0.1259,<br>Rsigma = 0.0621]                          |
| Data/Restraints/Parameter                        | 5211/0/307                                       | 7494/0/530                                                       | 5923/0/335                                                        |
| Goodness-of-fit on F <sup>2</sup>                | 1.061                                            | 1.050                                                            | 1.183                                                             |
| Final R indices [I > 2σ(I)]                      | R1 = 0.0306<br>wR2 = 0.0785                      | R1 = 0.0753<br>wR2 = 0.1355                                      | R1 = 0.0923,<br>wR2 = 0.2182                                      |
| Largest diff. peak and hole [e·Å <sup>-3</sup> ] | 0.431 and -0.396                                 | 0.606 and -0.411                                                 | 5.08/-3.24                                                        |

**Table S2** Data collection and structure refinement details for the actinide complexes **3** and **4**.

| <b>Compound</b>                                  | <b>3</b>                                             | <b>4</b>                                            |
|--------------------------------------------------|------------------------------------------------------|-----------------------------------------------------|
| Formula                                          | C <sub>58</sub> H <sub>63</sub> P <sub>2</sub> SClTh | C <sub>51</sub> H <sub>55</sub> P <sub>2</sub> SCIU |
| CCDC                                             | 2307048                                              | 2307047                                             |
| Formula weight                                   | 1121.57                                              | 908.36                                              |
| Temperature [K]                                  | 173.0                                                | 173.0                                               |
| Wave length [Å]                                  | 1.54184                                              | 0.71073                                             |
| Crystal system                                   | orthorhombic                                         | Triclinic                                           |
| Space group                                      | <i>Pca2<sub>1</sub></i>                              | <i>P-1</i>                                          |
| a [Å]                                            | 12.1389(3)                                           | 12.0774(7)                                          |
| b [Å]                                            | 14.1799(4)                                           | 14.1627(7)                                          |
| c [Å]                                            | 14.3984(4)                                           | 14.3748(8)                                          |
| α [°]                                            | 94.1930(10)                                          | 94.016(2)                                           |
| β [°]                                            | 90.4360(10)                                          | 90.702(2)                                           |
| γ [°]                                            | 93.0160(10)                                          | 93.297(2)                                           |
| Volumen [Å <sup>3</sup> ]                        | 2468.15(12)                                          | 2448.4(2)                                           |
| Z                                                | 4                                                    | 2                                                   |
| Calc. density [Mg·m <sup>-3</sup> ]              | 3.018                                                | 1.529                                               |
| μ (MoKα) [mm <sup>-1</sup> ]                     | 6.440                                                | 3.516                                               |
| F(000)                                           | 2256.0                                               | 1132.0                                              |
| Crystal dimensions [mm]                          | 0.11x 0.07x 0.03                                     | 0.04x 0.04 x 0.01                                   |
| Theta range θ [°]                                | 5.064 to 59.998                                      | 3.904 to 55.762                                     |
| Index ranges                                     | -17 ≤ h ≤ 17<br>-19 ≤ k ≤ 19<br>-20 ≤ l ≤ 20         | -15 ≤ h ≤ 15<br>-18 ≤ k ≤ 18<br>-18 ≤ l ≤ 18        |
| Reflections collected                            | 129878                                               | 65581                                               |
| Independent reflections                          | 14377 [Rint = 0.0368,<br>Rsigma = 0.0220]            | 11657 [Rint = 0.0560,<br>Rsigma = 0.0489]           |
| Data/Restraints/Parameter                        | 14377/0/579                                          | 1167/0/579                                          |
| Goodness-of-fit on F <sup>2</sup>                | 1.091                                                | 1.033                                               |
| Final R indices [I>2sigma(I)]                    | R1 = 0.0193,<br>wR2 = 0.0393                         | R1 = 0.0341,<br>wR2 = 0.0635                        |
| Largest diff. peak and hole [e·Å <sup>-3</sup> ] | 1.77/-0.76                                           | 1.20 and -0.97                                      |

## 2.2 Crystal Structure Determination of Ylide 1-H and Yldiide 1-K

### Ylide 1-H

The ylide was prepared as described in reference 2. Single crystals were obtained by slow concentration of a cyclohexane solution.

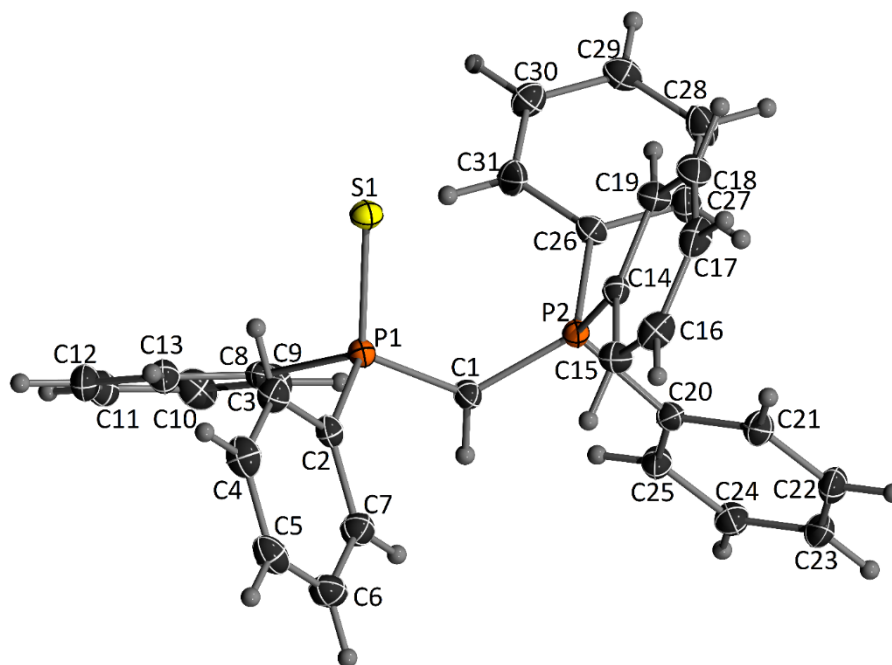

**Figure S20:** Molecular structure of compound **1-H**. Thermal ellipsoids at 50% probability level. Selected bond lengths [Å] and angles [°]: P1-C1 1.7294(13), C1-P2 1.6959(13), P1-S1 1.9729(4), P1-C1-P2 110.60(6). Symmetry operations:  $-x+1/2, y+1/2, -z+1/2$ ;  $-x, -y, -z$ ;  $x-1/2, -y-1/2, z-1/2$

### Yldiide 1-K

The yldiide was synthesized as described in ref 2. The yldiide was dissolved in as little THF as possible and 1 eq 18-crown-6 was added. Single crystals were obtained at room temperature by diffusion of hexane into the thf solution.

The crown ether and phenyl rings of the phosphonium moiety were disordered. The disorder was refined by using the PART keyword and free variables. Refinement led to approx. ratios of 68:32 in case of the phenyl groups and 55:45 for the disordered crown ether. The ellipsoids of the crown ether were additionally treated with EADP constraints.

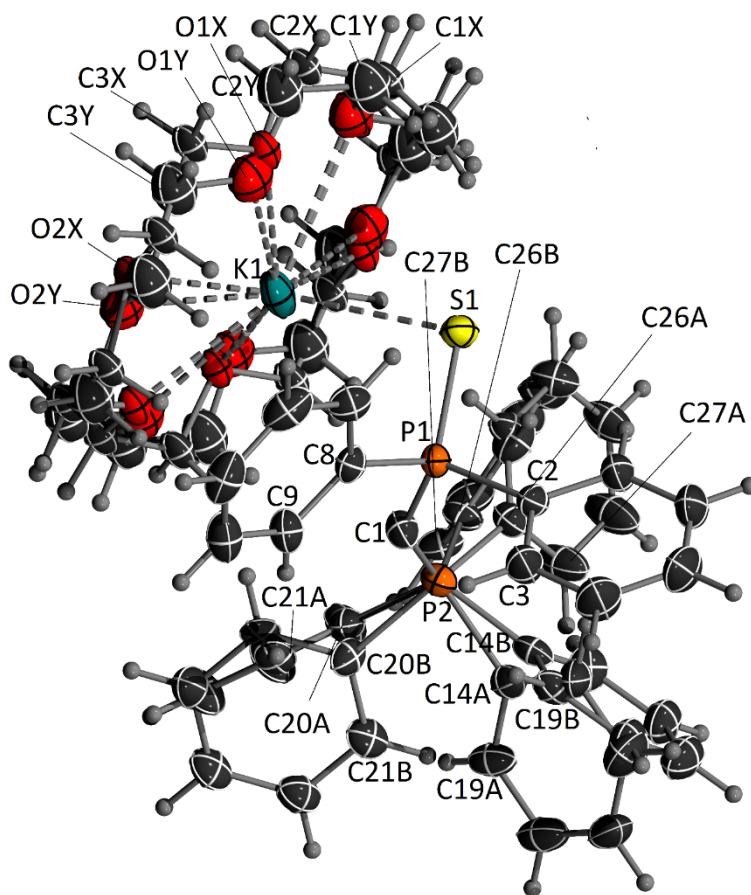

**Figure S21:** Molecular structure of compound **1-K**. Thermal ellipsoids at 50% probability level. Selected bond lengths [Å] and angles [°]: P1-C1 1.664(3), C1-P2 1.607(3), P1-S1 2.0179(9), P1-C1-P2 141.25(19). Symmetry operations:  $-x, -y, -z$

## 2.3 Crystal Structure Determination of the mercury and actinide complexes

### Mercury yldiide 2

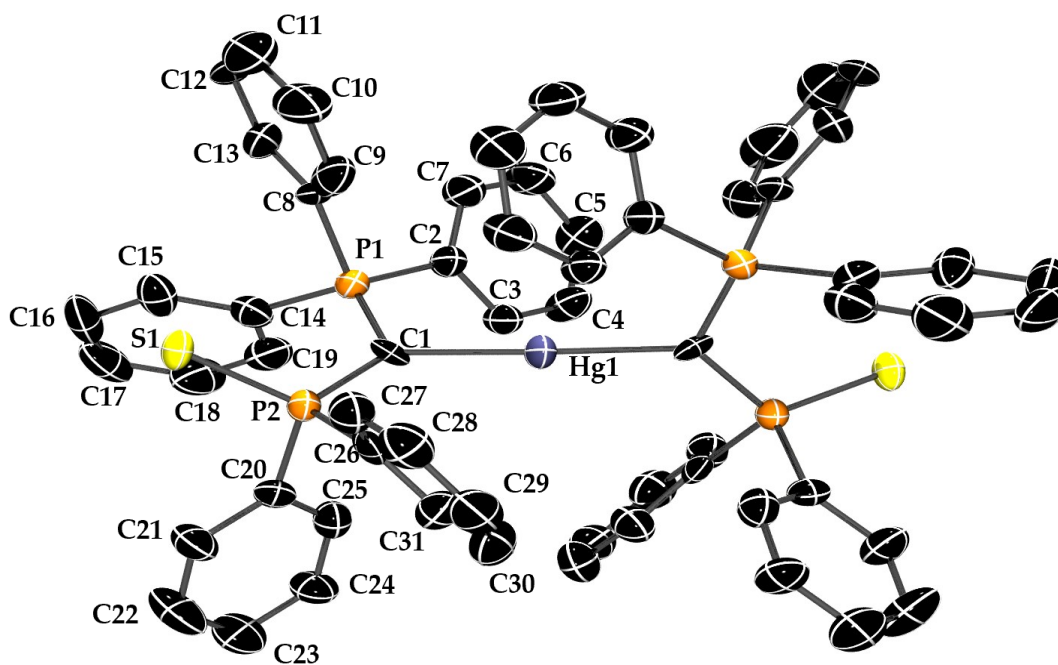

**Figure S22:** Molecular structure of compound **2**. Thermal ellipsoids at 50% probability level. Selected bond lengths [Å] and angles [°]: Hg1-C1 2.096(11), C1-P1 1.750(11), P1-S1 1.994(4), P2-C1-P1 120.5(7). Symmetry operations: 1-X,+Y,3/2-Z

Thorium yldiide **3**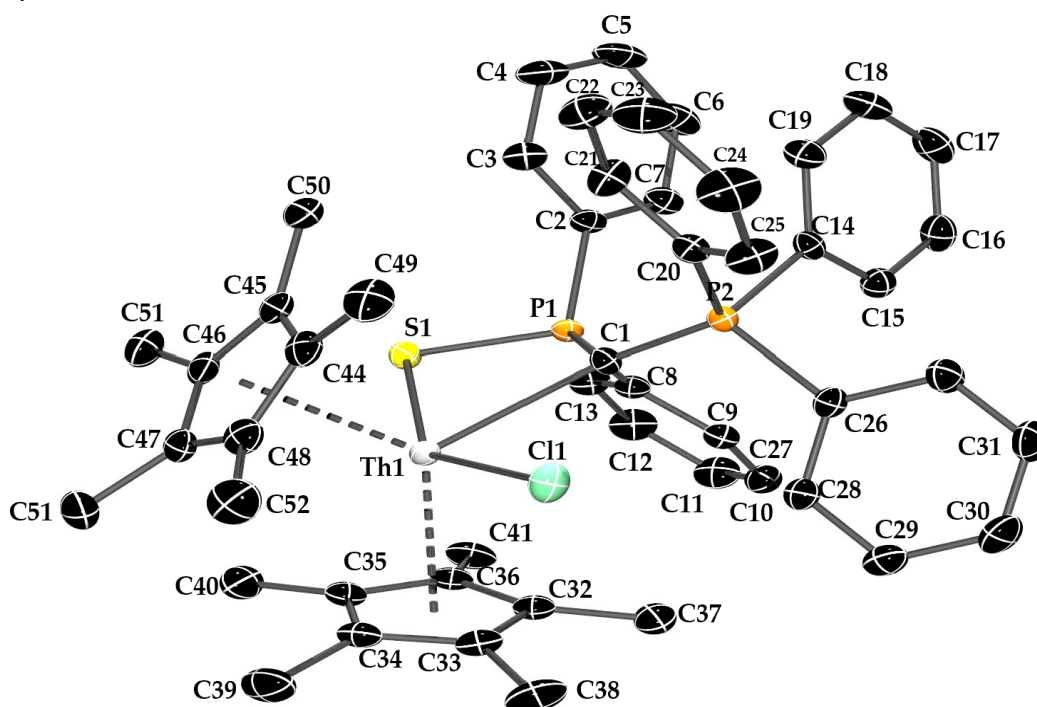

**Figure S23:** Molecular structure of compound **3**. Thermal ellipsoids at 50% probability level. Selected bond lengths [Å] and angles [°]: Th1-C1 2.6620(16), Th1-S1 2.8885(4), P1-S1 2.0317(6), P1-C1-P2 123.73(10).

Uranium yldiide, **4**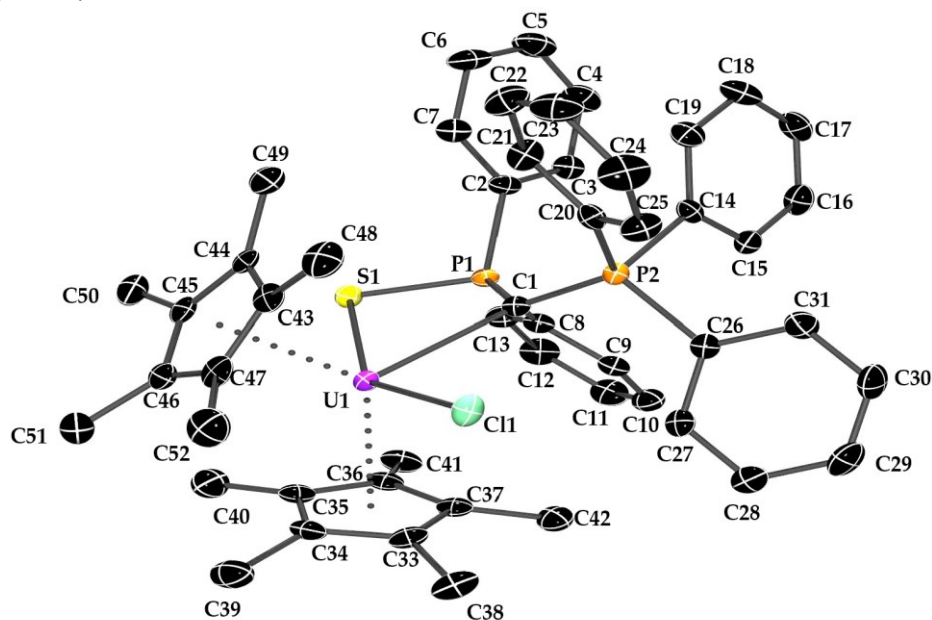

**Figure S24:** Molecular structure of compound **4**. Thermal ellipsoids at 50% probability level. Selected bond lengths [Å] and angles [°]: U1-C1 2.554(3), Th1-S1 2.8357(8), P1-S1 2.0308(12), P1-C1-P2 123.30(19).

### 3 Computational details

#### 3.1 General

All calculations were performed without symmetry restrictions. Starting coordinates were obtained with GaussView 6.0<sup>[5]</sup> or directly from the crystal structure analyses. The geometry optimizations were carried out with the Gaussian16 (Revision C.01) program package.<sup>[6]</sup>

Energy optimizations were performed using Density Functional Theory (DFT) with the B3PW91 functional<sup>[7]</sup> using the double- $\zeta$  basis set def2svp<sup>[8]</sup> basis set in conjunction with Grimme's D3 dispersion correction. Dolg's MWB60-ECP was employed for the heavy atoms (Hg, U, Th).<sup>[9]</sup> Frequency analyses were performed on the same level of theory and showed no imaginary frequency, thus confirming the structures to be local minima on the potential energy surface. The geometries obtained after energy optimization were used for subsequent single point energy calculations on a higher level of theory (def2tzvp)<sup>[7]</sup> and bonding analyses. The NBO analyses were performed with NBO Version 7.0,<sup>[10]</sup> Quantum Theory of Atoms in Molecules (QTAIM) analyses<sup>[11]</sup> using Multiwfn<sup>[12]</sup> to depict the topological properties of the respective molecules. The results were visualized using the ChemCraft software<sup>[13]</sup> and are depicted below.

#### 3.2 Results of the bonding analysis of yldiide 1 and its complexes 2-4

**Table S3:** Results of the computational studies of the yldiide **1-K** and yldiide complexes **2-4**; WBIs and NPA charges and features of the bond critical points; (b3pw91/def2TZVP/MWB60)

|                                       | 1-K    | 1 <sub>2</sub> Hg (2) | Th complex 3 | U complex 4 |
|---------------------------------------|--------|-----------------------|--------------|-------------|
| WBI (C-M)                             | 0.0180 | 0.4607                | 0.605        | 0.7229      |
| WBI (C-P(S))                          | 1.1775 | 0.9855                | 1.077        | 1.0857      |
| WBI (C-P <sub>PPh<sub>3</sub></sub> ) | 1.3865 | 1.1642                | 1.1467       | 1.15        |
| WBI (P=S)                             | 1.1605 | 1.3118                | 1.0077       | 1.0464      |
| q(C1) [e]                             | -1.556 | -1.634                | -1.488       | -1.421      |
| q(P <sub>PPh<sub>3</sub></sub> ) [e]  | 1.560  | 1.624                 | 1.652        | 1.651       |
| q(P(S)) [e]                           | 1.395  | 1.383                 | 1.515        | 1.492       |
| q(M) [e]                              | 0.876  | 1.249                 | 0.755        | 0.575       |
| q(S) [e]                              | -0.789 | -0.661                | -0.388       | -0.389      |
| $\Sigma$ q(ligand)                    | -0.954 | -0.625                | -0.007       | -0.011      |
| $\rho$ (BCP-MC)                       | 0.014  | 0.126                 | 0.062        | 0.069       |
| $\epsilon$ (BCP-MC)                   | 0.039  | 0.041                 | 0.018        | 0.041       |



## Quantum Theory of Atoms in Molecules

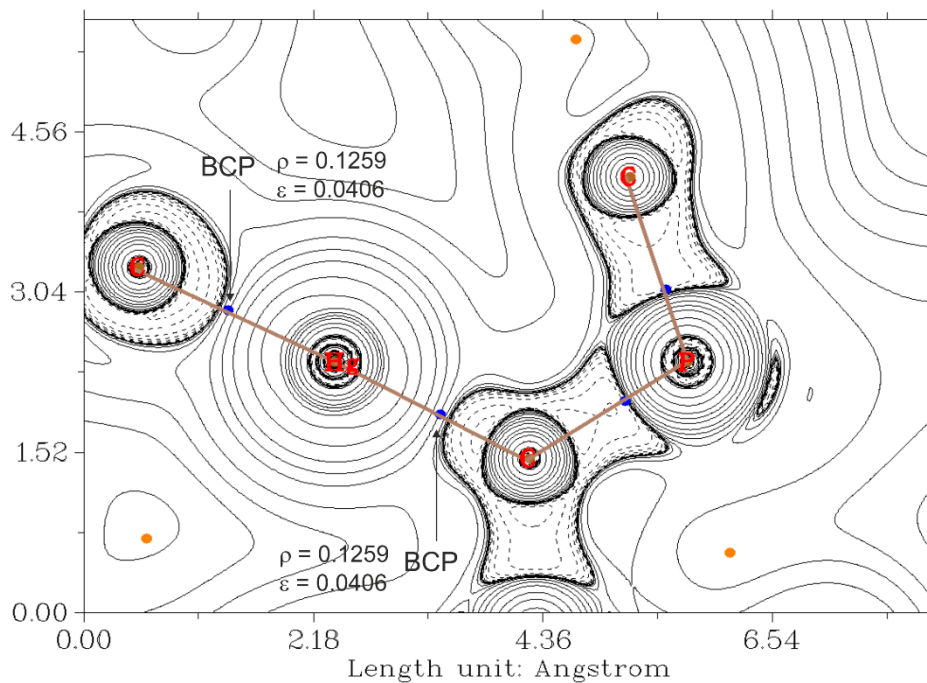

**Figure S25:** Contour plots of the Laplacian of the electron density in the plane of the Hg-C-P plane of compound **2**. Blue points indicate bond-critical points (BCPs), values for electron density and ellipticity are indicated in the figure.

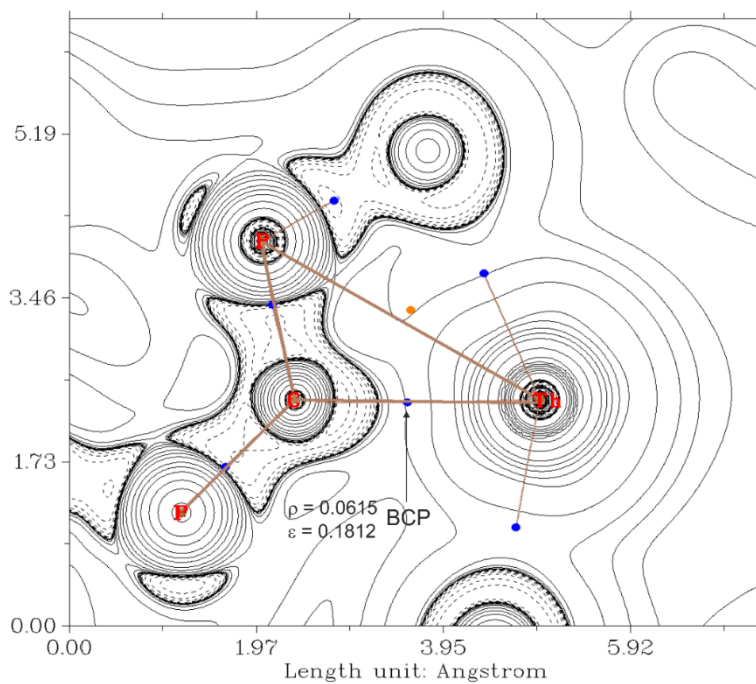

**Figure S26:** Contour plots of the Laplacian of the electron density in the plane of the Th-C-P plane of compound **3**. Blue points indicate bond-critical points (BCPs), values for electron density and ellipticity are indicated in the figure.

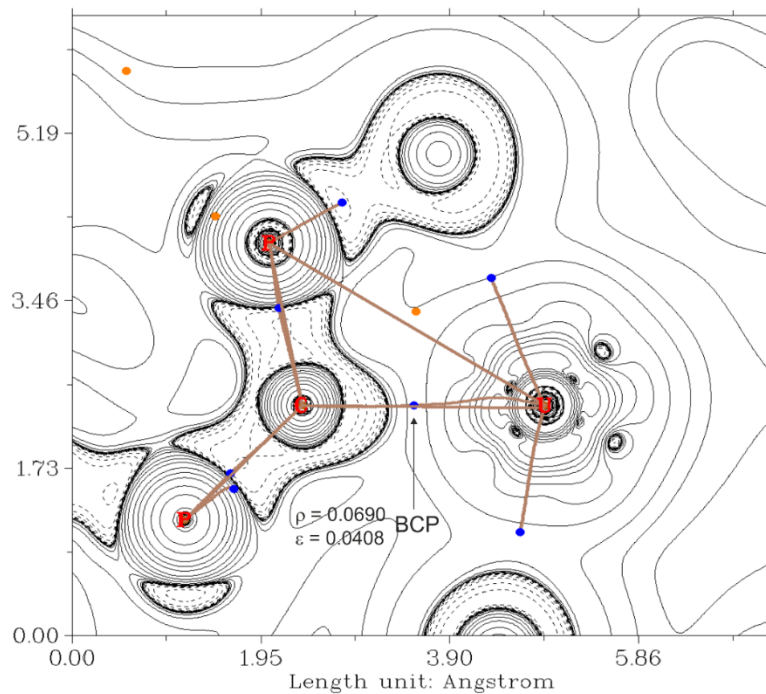

**Figure S27:** Contour plots of the Laplacian of the electron density in the plane of the U-C-P plane of compound 4. Blue points indicate bond-critical points (BCPs), values for electron density and ellipticity are indicated in the figure.

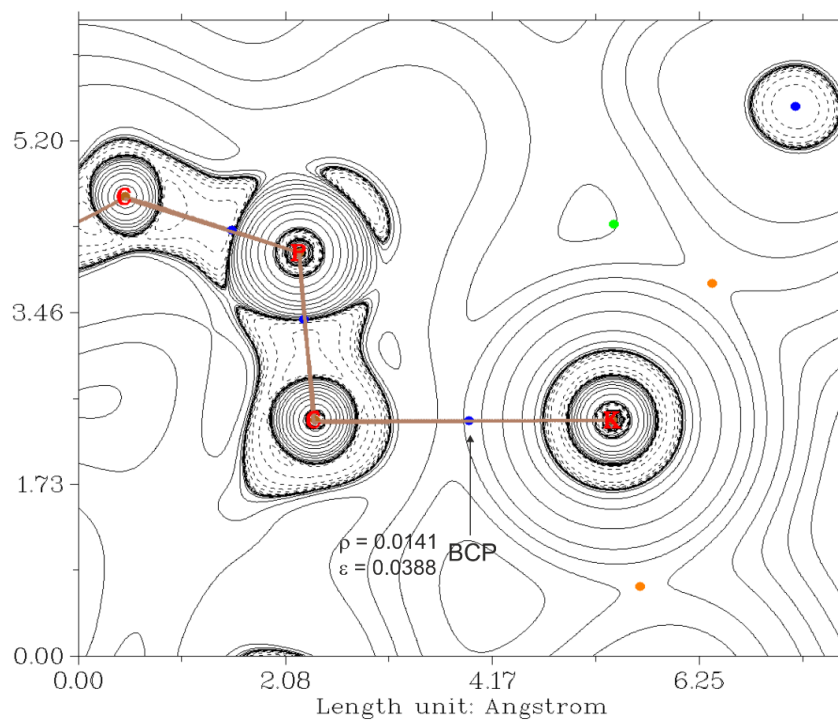

**Figure S28:** Contour plots of the Laplacian of the electron density in the plane of the K-C-P plane of compound 1-K. Blue points indicate bond-critical points (BCPs), values for electron density and ellipticity are indicated in the figure.

Supporting Information

**Molecular orbitals**

**HgY<sub>2</sub> (Compound 2)**

HOMO

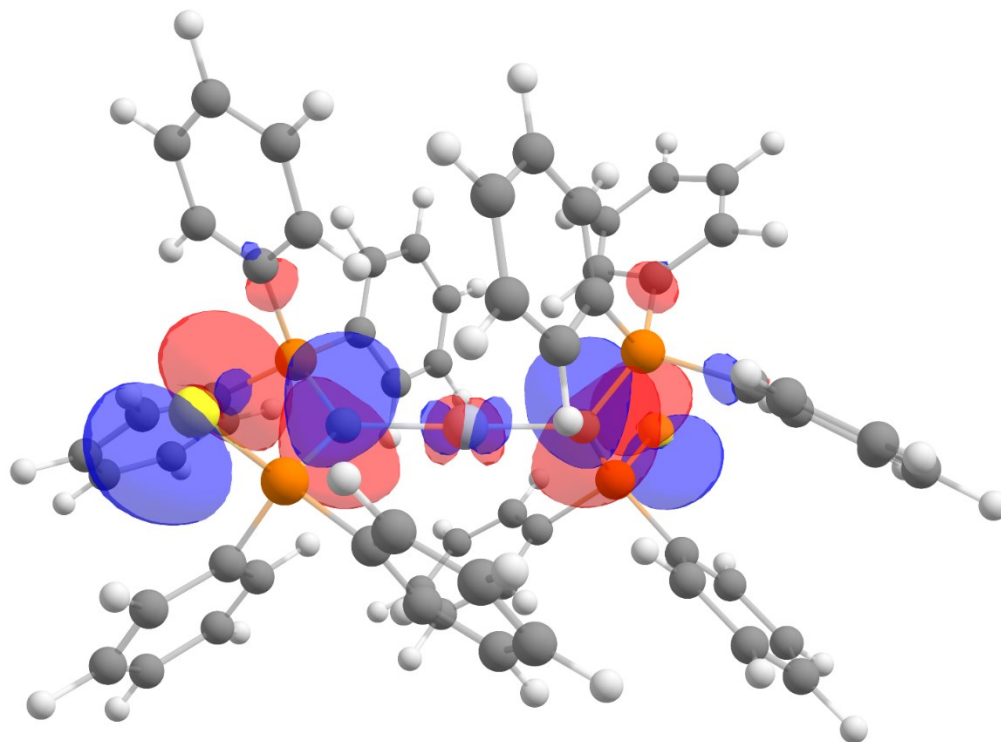

HOMO -1

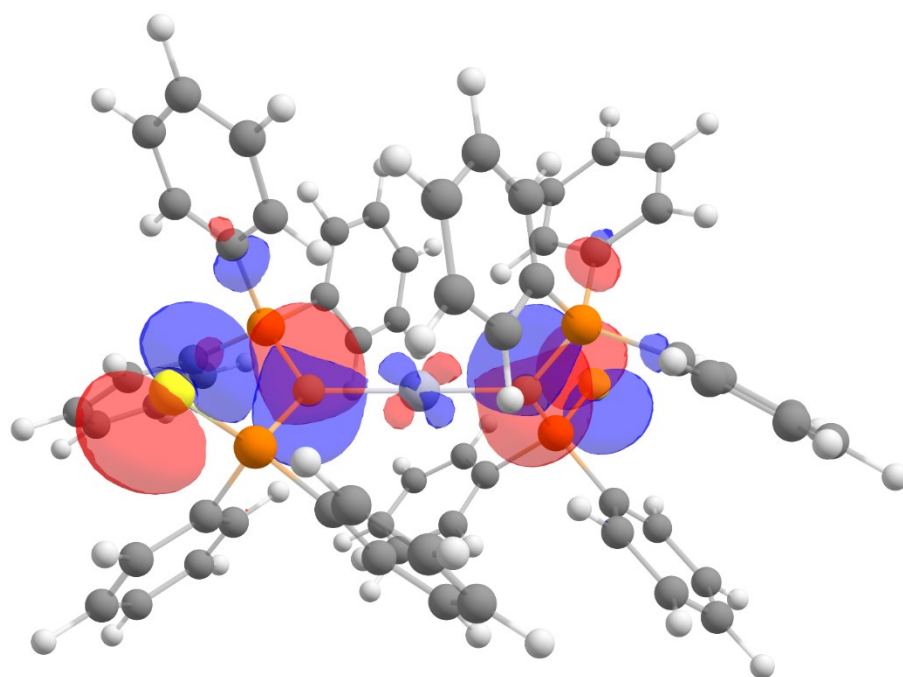

Supporting Information

**YThClCp<sub>2</sub>** (Compound 3)

HOMO

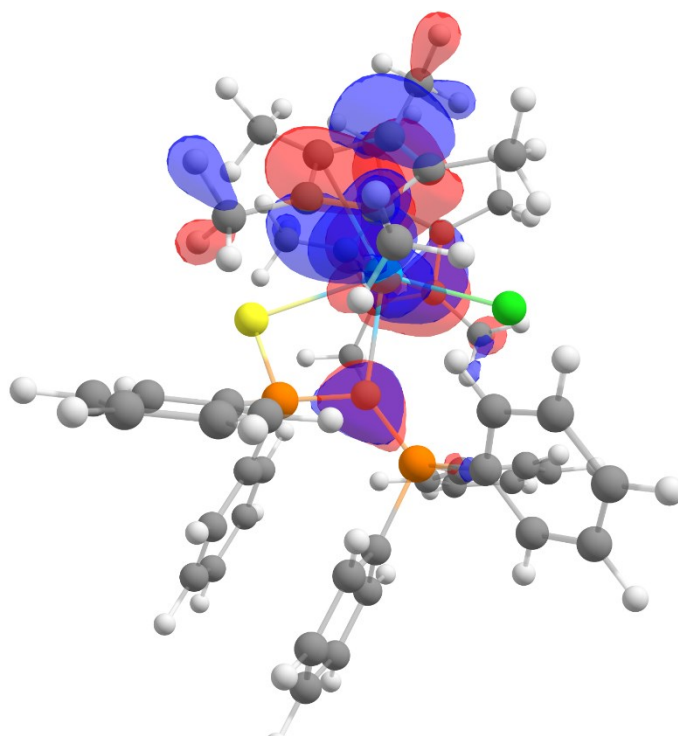

HOMO -1

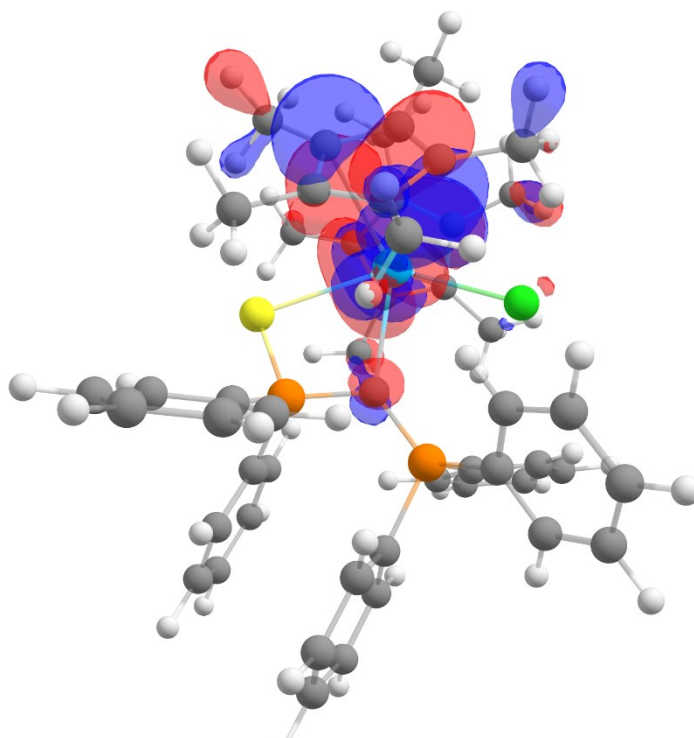

Supporting Information

HOMO -2

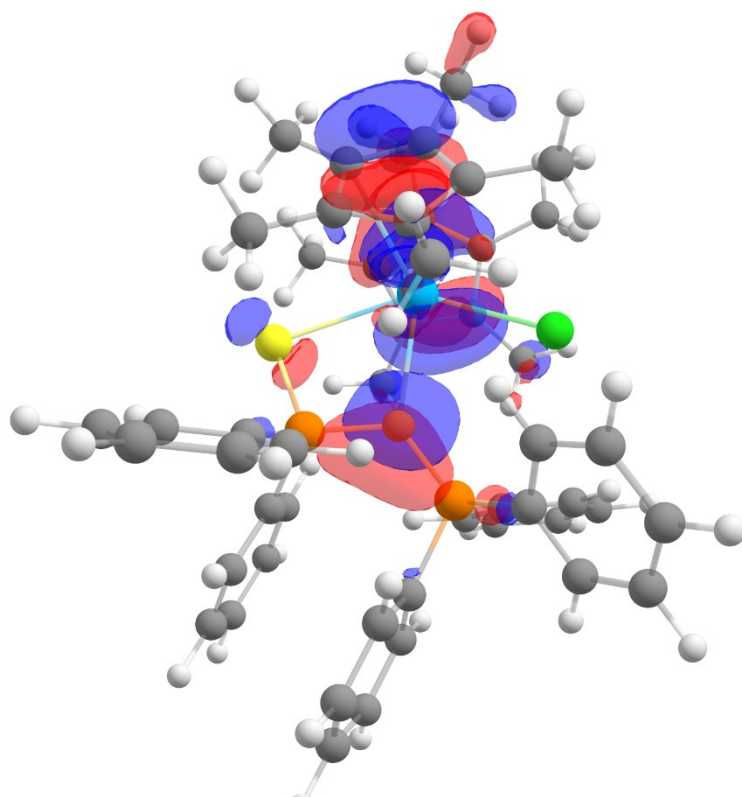

HOMO -6

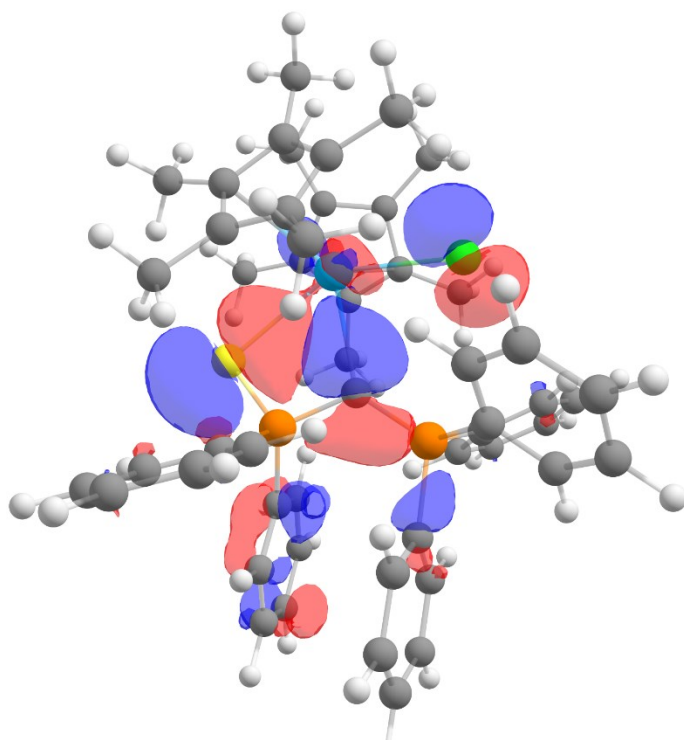

Supporting Information

**YUClCp<sub>2</sub> (Compound 4)**

HOMO -1

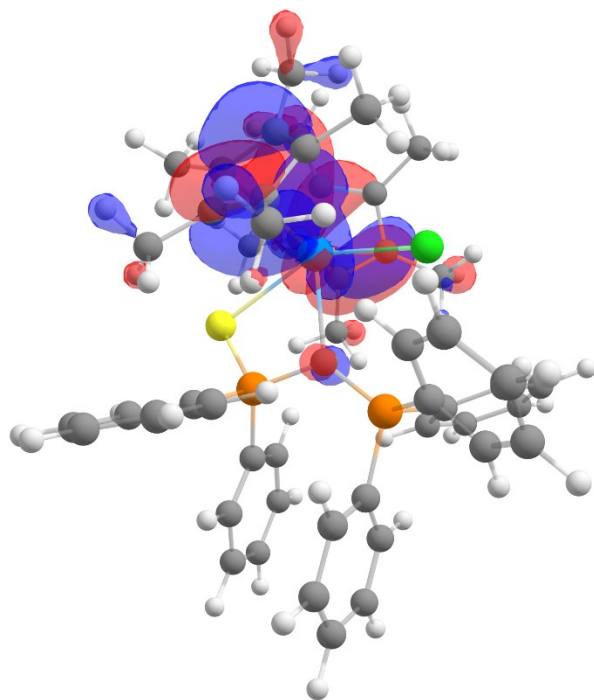

HOMO-4

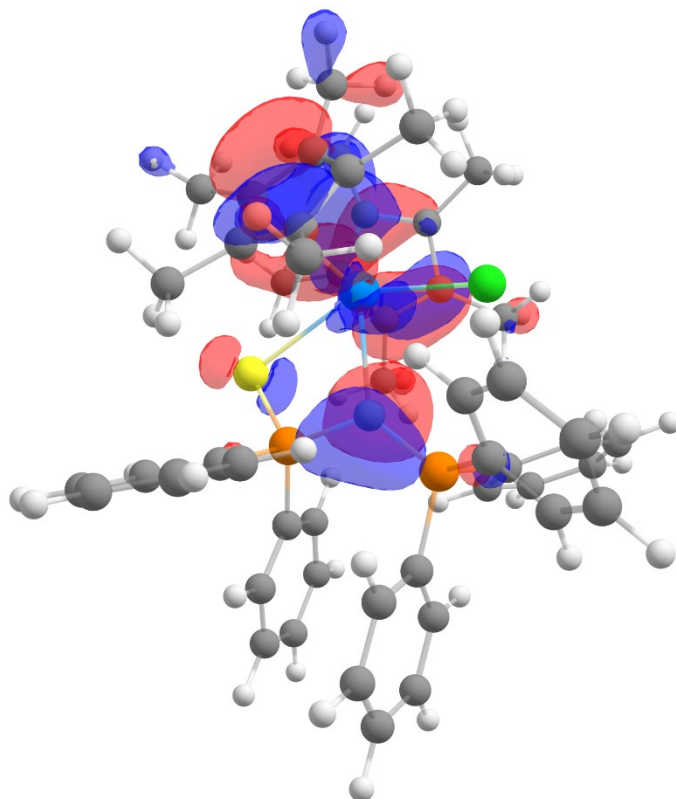

Supporting Information

HOMO-7

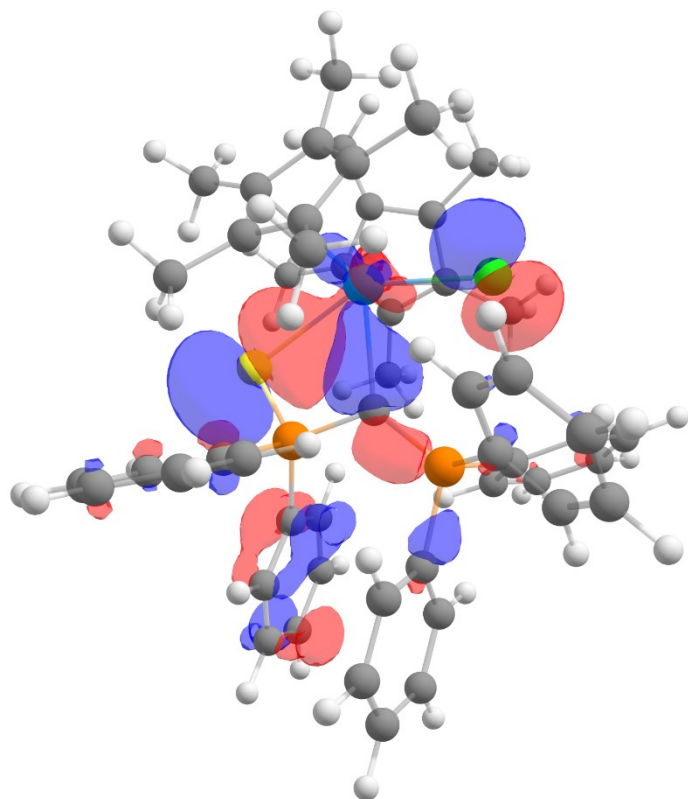

Supporting Information

1-K

HOMO

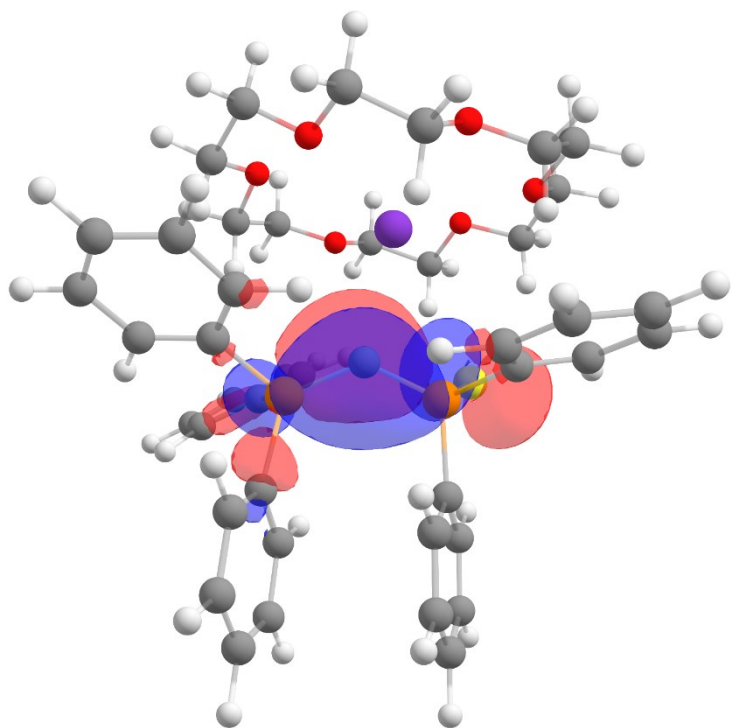

HOMO-1

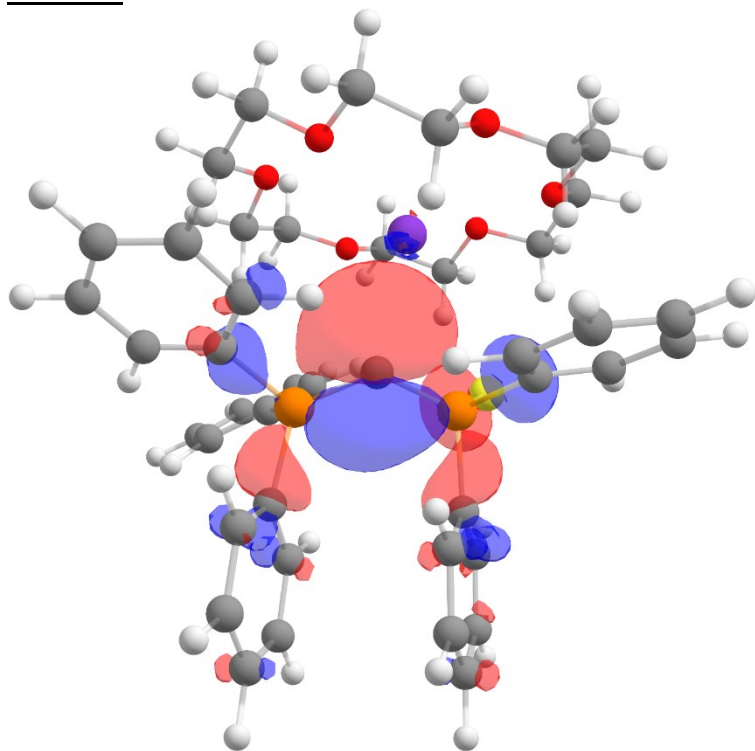



### 3.3 Coordinates of optimized structures

Level of theory: (b3pw91//def2svp)

#### Y<sub>2</sub>Hg

| Atom | x           | y          | z           |
|------|-------------|------------|-------------|
| Hg   | 4.12370100  | 3.70102000 | 12.61920400 |
| C    | 6.15840900  | 3.68507700 | 12.28132800 |
| C    | 2.08901300  | 3.68335700 | 12.95717700 |
| P    | 7.27956200  | 4.61082000 | 13.27031200 |
| P    | 6.78646000  | 2.48411200 | 11.23760700 |
| P    | 0.96698100  | 4.60816500 | 11.96830300 |
| P    | 1.46209500  | 2.48154500 | 14.00061700 |
| S    | 8.71184100  | 3.64086200 | 14.25453600 |
| C    | 6.19271400  | 5.55277100 | 14.42487900 |
| C    | 8.00321000  | 5.91807600 | 12.18764700 |
| C    | 8.06078900  | 3.11193700 | 10.08937000 |
| C    | 7.52644600  | 1.03303900 | 12.06071800 |
| C    | 5.41074800  | 1.80565500 | 10.24137800 |
| S    | -0.46425700 | 3.63700500 | 10.98375300 |
| C    | 2.05300000  | 5.55143700 | 10.81404300 |
| C    | 0.24193800  | 5.91441600 | 13.05125200 |
| C    | 0.18724900  | 3.10797600 | 15.14905100 |
| C    | 0.72343200  | 1.02996600 | 13.17721600 |
| C    | 2.83846800  | 1.80413300 | 14.99664400 |
| C    | 6.23009300  | 5.28565100 | 15.79492300 |
| C    | 5.27694300  | 6.48981500 | 13.92835000 |
| C    | 7.37493800  | 6.25361000 | 10.98230600 |
| C    | 9.20573900  | 6.54083500 | 12.54024100 |
| C    | 7.75373700  | 3.43170200 | 8.75982800  |
| C    | 9.31766500  | 3.45397300 | 10.61403000 |
| C    | 8.50174600  | 0.24143500 | 11.44302400 |
| C    | 7.03362500  | 0.68697000 | 13.32442200 |
| C    | 4.52481700  | 2.68366700 | 9.59094700  |
| C    | 5.18671400  | 0.42459300 | 10.17047400 |
| C    | 2.01630100  | 5.28430100 | 9.44398200  |
| C    | 2.96753800  | 6.48954700 | 11.31084400 |
| C    | 0.86975000  | 6.25021400 | 14.25676000 |
| C    | -0.96119000 | 6.53606600 | 12.69873700 |
| C    | 0.49416000  | 3.42775900 | 16.47862400 |
| C    | -1.06998000 | 3.44900800 | 14.62458700 |
| C    | -0.25128200 | 0.23745100 | 13.79466700 |
| C    | 1.21665200  | 0.68452900 | 11.91349200 |
| C    | 3.72361400  | 2.68281600 | 15.64723300 |
| C    | 3.06378000  | 0.42326200 | 15.06722200 |
| H    | 6.98541800  | 4.58641700 | 16.16668100 |
| C    | 5.31633200  | 5.90115100 | 16.65373600 |
| C    | 4.36581600  | 7.10638100 | 14.78552800 |
| H    | 5.27774800  | 6.72375300 | 12.86263000 |
| H    | 6.45212800  | 5.73736100 | 10.70471600 |
| C    | 7.94828800  | 7.20002500 | 10.13303400 |

## Supporting Information

|   |             |             |             |
|---|-------------|-------------|-------------|
| C | 9.77319400  | 7.49199400  | 11.69251900 |
| H | 9.70389700  | 6.24429000  | 13.46765000 |
| H | 6.78479800  | 3.16115300  | 8.33512300  |
| C | 8.68557800  | 4.10659400  | 7.97118200  |
| C | 10.23817800 | 4.13803800  | 9.82262900  |
| H | 9.55687800  | 3.22363900  | 11.65703800 |
| H | 8.88989900  | 0.51835200  | 10.45924900 |
| C | 8.98232200  | -0.89773700 | 12.09039100 |
| C | 7.50957600  | -0.45704400 | 13.96095400 |
| H | 6.28997600  | 1.32849200  | 13.80509800 |
| H | 4.66870300  | 3.76594300  | 9.65930500  |
| C | 3.43512600  | 2.17931600  | 8.88442700  |
| C | 4.09058200  | -0.07275300 | 9.46303500  |
| H | 5.85876400  | -0.26585200 | 10.68383500 |
| H | 1.26191200  | 4.58417100  | 9.07200900  |
| C | 2.92958600  | 5.90087600  | 8.58543700  |
| C | 3.87818400  | 7.10718800  | 10.45392400 |
| H | 2.96615900  | 6.72347100  | 12.37656800 |
| H | 1.79306200  | 5.73481500  | 14.53426300 |
| C | 0.29535300  | 7.19577500  | 15.10627600 |
| C | -1.52969700 | 7.48637900  | 13.54670400 |
| H | -1.45896000 | 6.23931100  | 11.77118700 |
| H | 1.46338100  | 3.15798700  | 16.90317800 |
| C | -0.43819600 | 4.10167100  | 17.26749900 |
| C | -1.99101500 | 4.13210000  | 15.41622000 |
| H | -1.30908900 | 3.21867000  | 13.58155700 |
| H | -0.63974100 | 0.51386400  | 14.77846100 |
| C | -0.73088100 | -0.90198300 | 13.14703700 |
| C | 0.74168600  | -0.45975000 | 11.27670300 |
| H | 1.95982700  | 1.32673400  | 11.43299000 |
| H | 3.57869400  | 3.76497400  | 15.57916700 |
| C | 4.81381200  | 2.17931600  | 16.35357900 |
| C | 4.16041800  | -0.07323000 | 15.77448000 |
| H | 2.39234600  | -0.26768800 | 14.55372900 |
| H | 5.34103100  | 5.67804500  | 17.72383300 |
| C | 4.37355600  | 6.79924000  | 16.14883100 |
| H | 3.64382800  | 7.82728500  | 14.39364800 |
| H | 7.46249000  | 7.44080800  | 9.18379500  |
| C | 9.14813600  | 7.82030000  | 10.48632100 |
| H | 10.71597900 | 7.97212300  | 11.96846700 |
| H | 8.43921900  | 4.35389900  | 6.93540400  |
| C | 9.92302300  | 4.47100700  | 8.50435000  |
| H | 11.20179400 | 4.42652000  | 10.24852400 |
| H | 9.74962300  | -1.51245400 | 11.61291600 |
| C | 8.48445000  | -1.24765100 | 13.34749100 |
| H | 7.12557800  | -0.72406100 | 14.94771600 |
| H | 2.74555600  | 2.86796000  | 8.39641500  |
| C | 3.21602300  | 0.80199100  | 8.81904200  |
| H | 3.91661300  | -1.15092600 | 9.42729000  |
| H | 2.90544400  | 5.67777400  | 7.51532500  |
| C | 3.87117800  | 6.80005200  | 9.09061600  |
| H | 4.59921800  | 7.82893000  | 10.84601600 |
| H | 0.78081300  | 7.43675100  | 16.05563900 |

## Supporting Information

|   |             |             |             |
|---|-------------|-------------|-------------|
| C | -0.90509300 | 7.81493500  | 14.75307000 |
| H | -2.47294200 | 7.96563600  | 13.27081500 |
| H | -0.19194500 | 4.34899700  | 18.30329800 |
| C | -1.67601900 | 4.46509100  | 16.73453100 |
| H | -2.95493200 | 4.41981500  | 14.99048400 |
| H | -1.49773200 | -1.51740800 | 13.62432100 |
| C | -0.23261400 | -1.25125600 | 11.88991900 |
| H | 1.12599400  | -0.72627000 | 10.28992900 |
| H | 5.50276700  | 2.86848300  | 16.84171600 |
| C | 5.03420100  | 0.80218000  | 16.41862000 |
| H | 4.33538500  | -1.15124900 | 15.80998300 |
| H | 3.65350200  | 7.27541800  | 16.81935800 |
| H | 9.60288000  | 8.55527500  | 9.81665600  |
| H | 10.64387000 | 5.01702700  | 7.89052100  |
| H | 8.86373500  | -2.13881300 | 13.85461400 |
| H | 2.35244500  | 0.41555500  | 8.27225400  |
| H | 4.59085700  | 7.27707800  | 8.42028800  |
| H | -1.36065500 | 8.54922800  | 15.42292800 |
| H | -2.39728600 | 5.01035300  | 17.34853900 |
| H | -0.61113400 | -2.14262600 | 11.38259100 |
| H | 5.89816600  | 0.41641900  | 16.96527500 |

## YThClCp<sub>2</sub>

| Atom | x           | y           | z           |
|------|-------------|-------------|-------------|
| C    | 4.72812800  | 9.66559500  | 3.69970700  |
| Th   | 2.82910000  | 10.94201400 | 2.49261900  |
| P    | 5.06495800  | 8.42464300  | 2.57558000  |
| P    | 5.69963100  | 9.97851900  | 5.06210600  |
| Cl   | 2.85657200  | 12.24106100 | 4.84612300  |
| S    | 4.17226800  | 8.96203500  | 0.81184900  |
| C    | 0.78979000  | 9.23169300  | 3.66648300  |
| C    | 0.21938200  | 10.53229900 | 3.56500900  |
| C    | 0.02199600  | 10.82044400 | 2.18634300  |
| C    | 0.53250100  | 9.72315600  | 1.43166900  |
| C    | 0.98314300  | 8.73165600  | 2.35124800  |
| C    | 2.27444300  | 12.95321000 | 0.42798100  |
| C    | 2.59740100  | 13.65956500 | 1.61993800  |
| C    | 3.97445800  | 13.42453700 | 1.90679300  |
| C    | 4.48739800  | 12.54798400 | 0.91361700  |
| C    | 3.42917700  | 12.23355800 | 0.01295900  |
| C    | 6.83878300  | 8.06838900  | 2.24238700  |
| C    | 4.41157800  | 6.77780300  | 3.04704700  |
| C    | 7.06592700  | 8.77647300  | 5.40262200  |
| C    | 6.52343100  | 11.61196000 | 5.01722100  |
| C    | 4.84049000  | 9.91480200  | 6.67706100  |
| C    | 0.83501000  | 8.41467700  | 4.91983600  |
| C    | -0.31714600 | 11.35768400 | 4.69270500  |
| C    | -0.86497900 | 11.92931800 | 1.71067000  |
| C    | 0.44838600  | 9.49017300  | -0.04530400 |
| C    | 1.29436200  | 7.31809300  | 1.97221300  |
| C    | 1.10885100  | 13.20470800 | -0.47740800 |

## Supporting Information

|   |             |             |             |
|---|-------------|-------------|-------------|
| C | 1.73604800  | 14.62989800 | 2.36984900  |
| C | 4.77889600  | 14.15382700 | 2.93387800  |
| C | 5.92638700  | 12.19405400 | 0.72513900  |
| C | 3.55006200  | 11.51495800 | -1.29553400 |
| C | 7.46948000  | 6.90550500  | 2.70009400  |
| C | 7.58949600  | 9.02994100  | 1.55341700  |
| C | 3.88556100  | 6.58360700  | 4.32414800  |
| C | 4.39621400  | 5.72376800  | 2.12345800  |
| C | 6.69722200  | 7.52914400  | 5.93257600  |
| C | 8.42402200  | 9.03541300  | 5.18127500  |
| C | 7.46860800  | 11.84265900 | 4.00623400  |
| C | 6.22713200  | 12.63408300 | 5.92598100  |
| C | 3.47308300  | 9.65286700  | 6.72608600  |
| C | 5.56910100  | 10.05203500 | 7.86825900  |
| H | -0.05377800 | 7.76127400  | 4.97052800  |
| H | 0.81586200  | 9.04730500  | 5.81627100  |
| H | 1.71292000  | 7.76063400  | 4.97424500  |
| H | -0.27522000 | 12.43142900 | 4.46142200  |
| H | 0.26262500  | 11.21422200 | 5.61434300  |
| H | -1.37101900 | 11.09894400 | 4.90109400  |
| H | -0.98642300 | 11.92172400 | 0.62229200  |
| H | -0.50891800 | 12.92475900 | 2.00937700  |
| H | -1.86906500 | 11.80612500 | 2.15136800  |
| H | 0.20744400  | 10.40611800 | -0.59939600 |
| H | -0.33245900 | 8.74635600  | -0.28266000 |
| H | 1.39666700  | 9.09399300  | -0.44254300 |
| H | 0.38046400  | 6.82476100  | 1.59607500  |
| H | 1.65725700  | 6.73243300  | 2.82544400  |
| H | 2.05510200  | 7.25799600  | 1.18124400  |
| H | 1.45164400  | 13.79787900 | -1.34351800 |
| H | 0.31004300  | 13.77616400 | 0.00873900  |
| H | 0.67057000  | 12.28429500 | -0.88618400 |
| H | 2.13860500  | 15.65408400 | 2.29233200  |
| H | 1.68874700  | 14.37789500 | 3.44114700  |
| H | 0.70871100  | 14.65365700 | 1.98131500  |
| H | 5.21067200  | 15.07377500 | 2.50077900  |
| H | 5.61073000  | 13.54544200 | 3.30257900  |
| H | 4.17222600  | 14.43339000 | 3.80391900  |
| H | 6.03191900  | 11.28613000 | 0.11666500  |
| H | 6.42775200  | 12.02653400 | 1.68623200  |
| H | 6.46577000  | 13.01069700 | 0.21375700  |
| H | 3.66089800  | 12.23549200 | -2.12586800 |
| H | 2.66098200  | 10.90539500 | -1.51467000 |
| H | 4.41984100  | 10.84445200 | -1.31660600 |
| H | 6.90256600  | 6.15020000  | 3.24636900  |
| C | 8.83493300  | 6.71712800  | 2.48150800  |
| C | 8.95429600  | 8.84363700  | 1.34380300  |
| H | 7.08941400  | 9.91997300  | 1.17239600  |
| H | 3.86589100  | 7.42771100  | 5.01669400  |
| C | 3.35550500  | 5.34454600  | 4.69035200  |
| C | 3.86742500  | 4.48733300  | 2.48658300  |
| H | 4.78425600  | 5.88314900  | 1.11371800  |
| H | 5.65166300  | 7.31828900  | 6.15715600  |

## Supporting Information

|   |             |             |             |
|---|-------------|-------------|-------------|
| C | 7.65592900  | 6.55605300  | 6.20263500  |
| C | 9.38426200  | 8.06078100  | 5.45657500  |
| H | 8.75202300  | 10.00094300 | 4.79918700  |
| H | 7.66321700  | 11.06771000 | 3.26139700  |
| C | 8.15260500  | 13.05515100 | 3.94111300  |
| C | 6.89996300  | 13.85461900 | 5.84600900  |
| H | 5.45392300  | 12.48767100 | 6.68157000  |
| H | 2.92723700  | 9.56324400  | 5.78857100  |
| C | 2.82668900  | 9.53061600  | 7.95679400  |
| C | 4.92128300  | 9.94052900  | 9.09645400  |
| H | 6.64622000  | 10.23805800 | 7.83430100  |
| H | 9.31823200  | 5.81063700  | 2.85351800  |
| C | 9.58113900  | 7.68445200  | 1.80885700  |
| H | 9.52850300  | 9.60141300  | 0.80425900  |
| H | 2.93595400  | 5.20638700  | 5.69009700  |
| C | 3.34644300  | 4.29547600  | 3.77105600  |
| H | 3.85024800  | 3.66910700  | 1.76209900  |
| H | 7.34432200  | 5.59141200  | 6.61074600  |
| C | 9.00578400  | 6.81810700  | 5.96160700  |
| H | 10.43776400 | 8.27968500  | 5.26738500  |
| H | 8.89009800  | 13.22016700 | 3.15196100  |
| C | 7.87273600  | 14.06245000 | 4.86750600  |
| H | 6.65232600  | 14.65239800 | 6.55037400  |
| H | 1.75378400  | 9.32640700  | 7.98830200  |
| C | 3.54812700  | 9.67817400  | 9.14134000  |
| H | 5.48968100  | 10.05126500 | 10.02336700 |
| H | 10.65111500 | 7.53465500  | 1.64275300  |
| H | 2.92495500  | 3.32624700  | 4.04999700  |
| H | 9.76092300  | 6.05687900  | 6.17335100  |
| H | 8.39814600  | 15.01905300 | 4.81159100  |
| H | 3.04189300  | 9.58652400  | 10.10589400 |

## YUCICp<sub>2</sub>

| Atom | x          | y           | z          |
|------|------------|-------------|------------|
| C    | 4.63890700 | 9.68788200  | 3.69122600 |
| U    | 2.80325200 | 10.91411200 | 2.50777400 |
| P    | 4.98951100 | 8.43971400  | 2.57076200 |
| P    | 5.60865200 | 9.98862600  | 5.06627000 |
| Cl   | 2.78567400 | 12.15533600 | 4.82261600 |
| S    | 4.09619200 | 8.99311200  | 0.81899300 |
| C    | 0.78501900 | 9.30965200  | 3.62725000 |
| C    | 0.20363700 | 10.60432400 | 3.52089700 |
| C    | 0.03095000 | 10.89914300 | 2.14535100 |
| C    | 0.57607200 | 9.81830800  | 1.38835500 |
| C    | 1.00988200 | 8.81957600  | 2.31287000 |
| C    | 2.16256700 | 12.90407300 | 0.43653800 |
| C    | 2.46150700 | 13.56054800 | 1.66109000 |
| C    | 3.83479300 | 13.30846900 | 1.96457800 |
| C    | 4.35535100 | 12.45018300 | 0.95690900 |
| C    | 3.30764900 | 12.17426600 | 0.02845200 |
| C    | 6.76505000 | 8.08419000  | 2.24226100 |

## Supporting Information

|   |             |             |             |
|---|-------------|-------------|-------------|
| C | 4.34081900  | 6.79264000  | 3.04440700  |
| C | 6.97598900  | 8.78360900  | 5.39487100  |
| C | 6.43162500  | 11.62039000 | 5.03247200  |
| C | 4.75599000  | 9.90375900  | 6.68271900  |
| C | 0.79102600  | 8.48109500  | 4.87297400  |
| C | -0.36523200 | 11.41702500 | 4.64000700  |
| C | -0.90076400 | 11.96920400 | 1.67002000  |
| C | 0.45977600  | 9.56171500  | -0.08136300 |
| C | 1.26823700  | 7.39336400  | 1.94005700  |
| C | 1.03264300  | 13.21604500 | -0.49320700 |
| C | 1.61413800  | 14.54756800 | 2.40423200  |
| C | 4.64714600  | 14.06589500 | 2.96515100  |
| C | 5.80273100  | 12.14227700 | 0.75419900  |
| C | 3.45108400  | 11.50070900 | -1.30041200 |
| C | 7.39195000  | 6.91814400  | 2.69785400  |
| C | 7.51887200  | 9.04333800  | 1.55351500  |
| C | 3.81070100  | 6.59513100  | 4.31927100  |
| C | 4.32749500  | 5.74125400  | 2.11775600  |
| C | 6.61112600  | 7.53596600  | 5.92680900  |
| C | 8.33334100  | 9.04507200  | 5.17108100  |
| C | 7.37579500  | 11.86020100 | 4.02270600  |
| C | 6.12865100  | 12.63679400 | 5.94537900  |
| C | 3.39435400  | 9.61558900  | 6.73403900  |
| C | 5.48774000  | 10.04036200 | 7.87211500  |
| H | -0.11108700 | 7.84436300  | 4.89766600  |
| H | 0.76417800  | 9.10552300  | 5.77501800  |
| H | 1.65459400  | 7.80937900  | 4.93769500  |
| H | -0.30695900 | 12.49315300 | 4.42450800  |
| H | 0.17770600  | 11.25307700 | 5.58032400  |
| H | -1.42811200 | 11.16256600 | 4.80374500  |
| H | -1.02607000 | 11.95496900 | 0.58260300  |
| H | -0.58942100 | 12.97764700 | 1.97024400  |
| H | -1.89727100 | 11.79846400 | 2.11264600  |
| H | 0.25391200  | 10.47675500 | -0.64942700 |
| H | -0.35862700 | 8.85046900  | -0.29373600 |
| H | 1.38400800  | 9.11775500  | -0.48228100 |
| H | 0.32621100  | 6.93056100  | 1.59488900  |
| H | 1.63129700  | 6.80225900  | 2.78924600  |
| H | 2.00339200  | 7.29878900  | 1.12954800  |
| H | 1.42827900  | 13.81451800 | -1.33288400 |
| H | 0.24212500  | 13.80882700 | -0.01980700 |
| H | 0.57310900  | 12.32464800 | -0.94028000 |
| H | 2.05888400  | 15.55653500 | 2.35986300  |
| H | 1.52542400  | 14.27589800 | 3.46728200  |
| H | 0.60145500  | 14.62145200 | 1.98569000  |
| H | 5.08661300  | 14.96401900 | 2.49458600  |
| H | 5.47423100  | 13.46495300 | 3.35447700  |
| H | 4.04508000  | 14.38480900 | 3.82447300  |
| H | 5.93403800  | 11.26897700 | 0.10186000  |
| H | 6.30749200  | 11.94324800 | 1.70730500  |
| H | 6.31872900  | 12.99904200 | 0.28521200  |
| H | 3.60832100  | 12.24860000 | -2.09882700 |
| H | 2.55474300  | 10.92407300 | -1.56942600 |

## Supporting Information

|   |             |             |             |
|---|-------------|-------------|-------------|
| H | 4.30507500  | 10.80980600 | -1.32080900 |
| H | 6.82305200  | 6.16413000  | 3.24368900  |
| C | 8.75628600  | 6.72468600  | 2.47769500  |
| C | 8.88305300  | 8.85230400  | 1.34339600  |
| H | 7.02198200  | 9.93411500  | 1.17108400  |
| H | 3.78792300  | 7.43604500  | 5.01500700  |
| C | 3.27841400  | 5.35558200  | 4.68007600  |
| C | 3.79649700  | 4.50426300  | 2.47552100  |
| H | 4.71843600  | 5.90303100  | 1.10950800  |
| H | 5.56703300  | 7.32316000  | 6.15577200  |
| C | 7.57239800  | 6.56503200  | 6.19564800  |
| C | 9.29608100  | 8.07299000  | 5.44596000  |
| H | 8.65920400  | 10.01071000 | 4.78781900  |
| H | 7.57557700  | 11.08964400 | 3.27480200  |
| C | 8.04985500  | 13.07822400 | 3.96049300  |
| C | 6.79262300  | 13.86223500 | 5.86904000  |
| H | 5.35614400  | 12.48264800 | 6.70014300  |
| H | 2.84737000  | 9.53026900  | 5.79730700  |
| C | 2.75571100  | 9.46499600  | 7.96558800  |
| C | 4.84701900  | 9.90220500  | 9.10134300  |
| H | 6.56123300  | 10.24573800 | 7.83625200  |
| H | 9.23609900  | 5.81546600  | 2.84753100  |
| C | 9.50591300  | 7.69030000  | 1.80629100  |
| H | 9.45943800  | 9.60858800  | 0.80412000  |
| H | 2.85544200  | 5.21513700  | 5.67802600  |
| C | 3.27111100  | 4.30925800  | 3.75763700  |
| H | 3.78056400  | 3.68839900  | 1.74838700  |
| H | 7.26339300  | 5.60023100  | 6.60529800  |
| C | 8.92120600  | 6.82980100  | 5.95249200  |
| H | 10.34876500 | 8.29434500  | 5.25526400  |
| H | 8.78508900  | 13.25143900 | 3.17105800  |
| C | 7.76199900  | 14.08075700 | 4.88946400  |
| H | 6.53981600  | 14.65591500 | 6.57616300  |
| H | 1.68716500  | 9.23888900  | 7.99827800  |
| C | 3.47945300  | 9.61217700  | 9.14880800  |
| H | 5.41711300  | 10.01302300 | 10.02718200 |
| H | 10.57517000 | 7.53660700  | 1.63915800  |
| H | 2.84741800  | 3.33978200  | 4.03228500  |
| H | 9.67837200  | 6.07053300  | 6.16395300  |
| H | 8.27922800  | 15.04190700 | 4.83543900  |
| H | 2.97960900  | 9.49874500  | 10.11437400 |

## YK

| Atom | x          | y          | z          |
|------|------------|------------|------------|
| S    | 8.82732400 | 7.86332700 | 6.94564900 |
| P    | 7.55863500 | 6.31731900 | 6.57925000 |
| K    | 5.59551300 | 9.25880200 | 6.05216100 |
| C    | 6.39173600 | 6.45527400 | 5.35959700 |
| C    | 6.60948400 | 5.98260100 | 8.13929000 |
| C    | 8.55737200 | 4.76108000 | 6.45273100 |
| O    | 5.79542500 | 9.90383000 | 8.88928400 |
| O    | 3.31734400 | 8.86443400 | 7.98666700 |

## Supporting Information

|   |             |             |             |
|---|-------------|-------------|-------------|
| O | 2.85943900  | 8.74767900  | 5.18646400  |
| O | 4.41692700  | 10.36947400 | 3.45812300  |
| O | 7.01564300  | 11.07973700 | 4.30650400  |
| O | 7.40118000  | 11.44370700 | 7.10646600  |
| P | 6.58566400  | 6.09888800  | 3.75840100  |
| C | 5.39868100  | 5.28069700  | 8.06413700  |
| C | 7.09530000  | 6.37526500  | 9.39126700  |
| C | 9.95373500  | 4.79087800  | 6.39896800  |
| C | 7.89311700  | 3.52993300  | 6.34702800  |
| C | 6.62325200  | 10.96052600 | 9.30283500  |
| C | 4.71016100  | 9.65514800  | 9.74179200  |
| C | 3.91982700  | 8.49140400  | 9.20536300  |
| C | 2.59680400  | 7.83035600  | 7.36604600  |
| C | 1.90363400  | 8.38921500  | 6.14848900  |
| C | 2.32472000  | 9.39509800  | 4.06025600  |
| C | 3.38657300  | 9.52876000  | 2.99988000  |
| C | 5.50774400  | 10.43893300 | 2.57124400  |
| C | 6.48890000  | 11.47102900 | 3.06538500  |
| C | 7.91191700  | 12.01183200 | 4.85713400  |
| C | 7.82140400  | 11.04847600 | 8.39358500  |
| C | 8.44899600  | 11.49815500 | 6.16866900  |
| C | 7.22197400  | 4.43858800  | 3.26596600  |
| C | 4.91411000  | 6.15211800  | 2.96655800  |
| C | 7.66739200  | 7.20009000  | 2.72444100  |
| H | 5.01789000  | 5.01641300  | 7.07277800  |
| C | 4.69609300  | 4.95154000  | 9.22530000  |
| C | 6.38562700  | 6.05939600  | 10.55236200 |
| H | 8.02933700  | 6.94325200  | 9.43251900  |
| C | 10.67800100 | 3.60546700  | 6.24754100  |
| H | 10.45942000 | 5.75767500  | 6.48149600  |
| H | 6.80143200  | 3.50051200  | 6.35648000  |
| C | 8.61604700  | 2.34837500  | 6.20572700  |
| H | 6.98106000  | 10.79275400 | 10.33922400 |
| H | 6.06637100  | 11.92029400 | 9.28994800  |
| H | 5.06238400  | 9.40031200  | 10.76211700 |
| H | 4.05705600  | 10.54869700 | 9.82059400  |
| H | 4.59358600  | 7.62978200  | 9.06642000  |
| H | 3.15073900  | 8.19909500  | 9.94880100  |
| H | 1.83101800  | 7.41428800  | 8.05269100  |
| H | 3.26902600  | 6.99931000  | 7.07473900  |
| H | 1.20768000  | 7.62687200  | 5.74225500  |
| H | 1.30054000  | 9.26895800  | 6.45079100  |
| H | 1.93508700  | 10.39562800 | 4.33811800  |
| H | 1.48776500  | 8.80815400  | 3.63257300  |
| H | 3.77831600  | 8.52860200  | 2.74825400  |
| H | 2.92000100  | 9.94466000  | 2.08288700  |
| H | 5.17240300  | 10.73828100 | 1.55699400  |
| H | 6.00667500  | 9.45548200  | 2.47901500  |
| H | 7.29746600  | 11.57397800 | 2.31359900  |
| H | 5.97697700  | 12.45069900 | 3.15482300  |
| H | 7.40564200  | 12.98491500 | 5.02015700  |
| H | 8.76290500  | 12.18770800 | 4.16730500  |
| H | 8.53236600  | 11.79040000 | 8.81327700  |



## Supporting Information

|   |             |             |             |
|---|-------------|-------------|-------------|
| H | 8.31987500  | 10.06119700 | 8.35320600  |
| H | 9.24675400  | 12.18936100 | 6.51214000  |
| H | 8.90089300  | 10.49657400 | 6.02963200  |
| C | 8.60379000  | 4.22532200  | 3.15587700  |
| C | 6.35111000  | 3.34627500  | 3.16050800  |
| C | 3.81443200  | 6.03102100  | 3.82530200  |
| C | 4.68917200  | 6.26407400  | 1.58770500  |
| C | 7.96582900  | 6.95719800  | 1.37316400  |
| C | 8.25568700  | 8.29718400  | 3.36234000  |
| H | 3.75528100  | 4.39794400  | 9.15607400  |
| C | 5.19010100  | 5.33927100  | 10.47369100 |
| H | 6.77075200  | 6.37322000  | 11.52678400 |
| C | 10.01242800 | 2.38283900  | 6.15651200  |
| H | 11.77046200 | 3.63929600  | 6.20543100  |
| H | 8.08698900  | 1.39657300  | 6.11392100  |
| H | 9.29493500  | 5.06497100  | 3.26231400  |
| C | 9.10255000  | 2.94389400  | 2.93102300  |
| C | 6.85208300  | 2.06467300  | 2.92862200  |
| H | 5.27284200  | 3.49980300  | 3.25919300  |
| H | 4.02373200  | 5.97972100  | 4.89785600  |
| C | 2.51589300  | 6.00905100  | 3.31740500  |
| C | 3.38793800  | 6.26113700  | 1.08006800  |
| H | 5.52573300  | 6.36985900  | 0.89685100  |
| H | 7.59001500  | 6.05550000  | 0.88235500  |
| C | 8.78064800  | 7.83479700  | 0.65888500  |
| C | 9.08545000  | 9.16660700  | 2.65094500  |
| H | 8.09634100  | 8.44469500  | 4.43390700  |
| H | 4.63988200  | 5.08729700  | 11.38453800 |
| H | 10.57924600 | 1.45529400  | 6.03808600  |
| H | 10.18189500 | 2.78787600  | 2.86662900  |
| C | 8.22837300  | 1.86173700  | 2.81147200  |
| H | 6.16364100  | 1.21979600  | 2.83961600  |
| H | 1.66721100  | 5.90560200  | 3.99889400  |
| C | 2.29763600  | 6.12863100  | 1.94300800  |
| H | 3.22612800  | 6.35984800  | 0.00340700  |
| H | 9.00061500  | 7.63912200  | -0.39417400 |
| C | 9.33523500  | 8.94982900  | 1.29617400  |
| H | 9.54640500  | 10.01074300 | 3.16939100  |
| H | 8.62167800  | 0.85665900  | 2.63791600  |
| H | 1.27993800  | 6.11820000  | 1.54326500  |
| H | 9.98296600  | 9.63205800  | 0.73855200  |

## 4 Nomenclature and Detailed Bonding Analysis

**Nomenclature.** “In this article, we compare different types of ligands, which are structurally related but differ in their overall charge. These ligands are methandiides (**A**) and yldiides (**B**), which furthermore are related to bisylides (**C**). The following figure compares the structure of these ligands and their differences in the overall charge. While methandiides are dianionic, the negative charges are equalized in bisylides by two onium moieties. The herein discussed yldiides are intermediate structures between both types of compounds with only one onium moiety, thus resulting in an overall monoanionic system. Formally, methandiides thus serve as  $X_2$ -type ligands, while yldiides are  $X,L$  and bisylides neutral  $L_2$ -type ligands. This is a simple formalism based on the overall charge of the different ligands according to Green’s classification of covalent compounds.<sup>[14]</sup> Thus, depending on the substitution pattern also a bisylide ligand may displace an anionic ligand in a complex and thus exhibit  $X$ -type ligand character. Because of the different overall charge, the compounds also exhibit different reactivities for example towards metal halides. The interested reader is referred to references 15-17, which discuss the reaction of methandiides, yldiides and carbodiphosporanes towards  $GeCl_2$ .dioxane, all giving different types of products.

We also would like to point out that the stabilizing effects of phosphonio moieties are different compared to phosphinoyl moieties. This becomes evident from the different P-C distances in **1** and **2**. As a result of metal coordination or alkylation of the sulfur atom, this difference becomes blurred and an yldiide or methanediide can be converted into a bisylide.

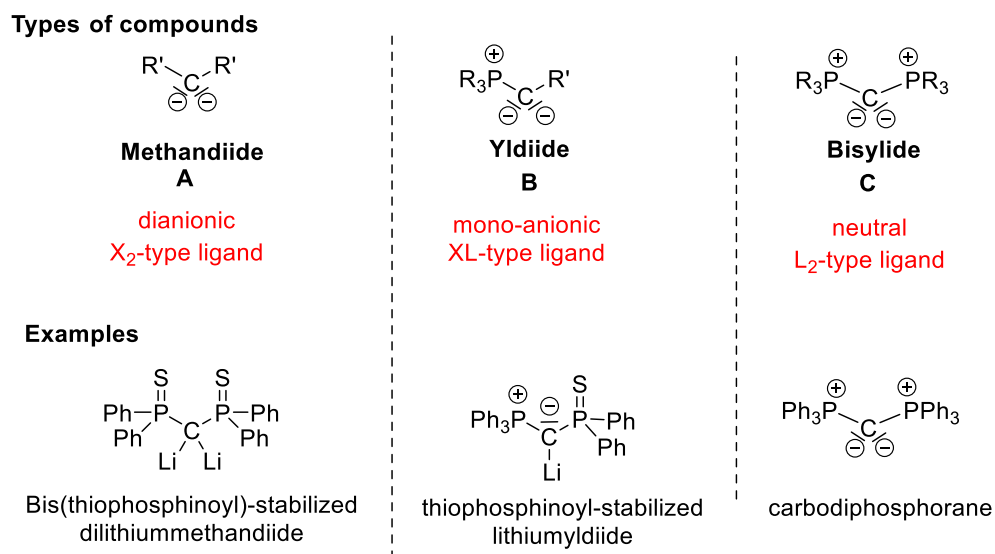

**Figure S29.** Comparison between divalent carbon ligands.

In the text, we use the terms ylides and metalated ylides. Both terms essentially describe the same type of compounds. However, the term ylide only focusses on the carbanionic ligand, while metalated ylide also includes the metal cation, which of course is always present. These terms are comparable to “methyl anion” or „methanide“ and “methyl lithium”.

### Electronic structure of ylide **1**.

The conclusions discussed here are based on the computational results given in Table S3.

The bonding situation in the ylide is characterized by ylidic bonding situations (Figure S26), which can be described by several canonical structures. According to the charge distribution within the ylide, structure **1'** with a maximum of formal charges would be the best representation. Yet, phosphine sulfides (like phosphine oxides) are usually depicted with a P=S double bond. Thus, we also selected this representation to facilitate the understanding of the structures and to emphasize that our primary focus in our investigation was the bonding arising from the ylidic carbon atom. The ylene structures **1''** and **1'''** don't agree with the true electron distribution, the bent geometry and the reactivity of the compounds.

We would also like to point out that ChemDraw structures are often simplified representations, which not necessarily describe the true electron distribution in a molecule. This is particularly true for compounds with delocalized or non-classical multi-center covalent bonds. However, also in simple molecules formal and natural charges do often not match each other and should also not be confused with each other. For example, the ammonium cation  $\text{NH}_4^+$  is often depicted with a positive formal charge at nitrogen, yet it bears a negative partial charge.

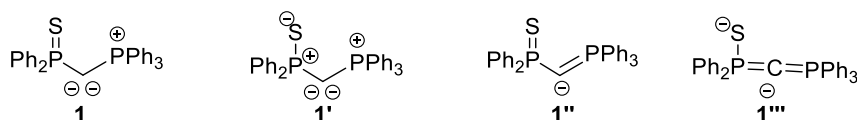

Figure S30. Possible resonance forms of ylide **1**.

### Bonding situation in compounds **1-4**.

The bonding situation in complexes **1-4** are likewise characterized by ylidic bonding situations and highly ionic metal carbon interactions (Figure S27). We opted for the description of the potassium compound **1** as a ionic salt like structure because of the very low covalent character of the C-K bond. This conclusion is based on our computational studies, which yielded a very low Wiberg bond index of the C-K bond (WBI = 0.018), a very low charge density at the bond critical point of only 0.014 and an overall charge of almost -1 on the ylide ( $q = -0.954$ ). These parameters clearly argue for an ionic bonding situation as expected for an organopotassium compound and is different compared to complexes **2** and **3**.

In comparison to **1**, the Hg-C bond features a more than twenty times higher WBI and a decreased charge on the ligand, which let us to depict this compound by a covalent bond, albeit the bond still has a significant ionic character as expressed by the low charge density at the BCP. Since the

WBI further increases to the actinides we kept the same description for the actinide complexes, albeit structure 3' certainly also contributes to the true electronic structure of the complexes as mentioned in the main text. The phosphoniocarbene structure 3'' however, does not contribute to the bonding situation since no  $\pi$ -interaction is observed as for example suggested by the NBO analysis.

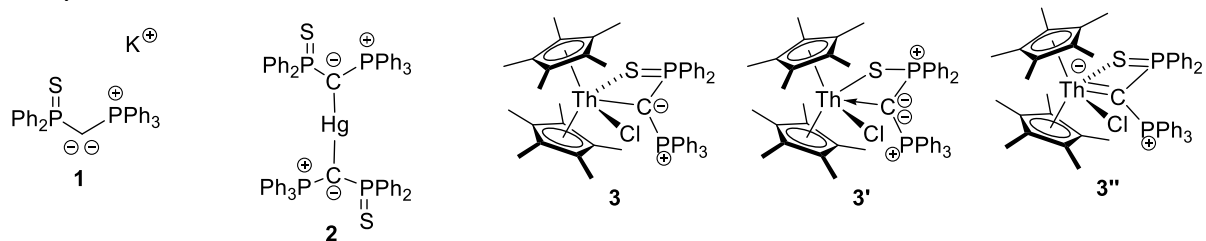

**Figure S31.** Structures of compounds 1-3.

## 5 Author Contributions

M. J. and A. J. G. carried out the synthetic work and standard analytical characterization. D. K. performed the computational, S. P. K. the crystallographic studies. V. H. G. and J. R. W. supervised the work and wrote the manuscript with contributions from all authors.

## 6 References

- [1] J. M. Manriquez, P. J. Fagan and T. J. Marks, *J. Am. Chem. Soc.* 1978, **100**, 3939–3941.
- [2] M. Jörges, F. Krischer and V. H. Gessner, *Science (New York, N.Y.)* 2022, **378**, 1331.
- [3] P. J. Bailey, R. A. Coxall, C. M. Dick, S. Fabre, L. C. Henderson, C. Herber, S. T. Liddle, D. Loroño-González, A. Parkin, S. Parsons, *Chem. Eur. J.*, 2003, **9**, 4820.
- [4] (a) G. M. Sheldrick, *Acta Crystallogr., Sect. A: Found. Crystallogr.* 2008, **64**, 112. (b) A. Thorn, B. Dittrich and G. M. Sheldrick, *Acta Crystallogr., Sect. A: Found. Crystallogr.* 2012, **68**, 448. (c) G. M. Sheldrick, *Acta Crystallogr., Sect. C: Struct. Chem.* 2015, **71**, 3.
- [5] R. Dennington, T. A. Keith and J. M. Millam, *Semichem Inc.*, 2016.
- [6] M. J. Frisch, G. W. Trucks, H. B. Schlegel, G. E. Scuseria, M. A. Robb, J. R. Cheeseman, G., *Gaussian, Inc.*, 2019.
- [7] a) A. D. Becke, *The Journal of Chemical Physics* **1993**, *98*, 5648; b) J. P. Perdew, J. A. Chevary, S. H. Vosko, K. A. Jackson, Pederson, D. J. Singh and C. Fiolhais, *Phys. Rev. B* 1992, **46**, 6671.

## Supporting Information

- [8] F. Weigend and R. Ahlrichs, *Physical chemistry chemical physics : PCCP* 2005, **7**, 3297.
- [9] X. Y. Cao and M. Dolg, *J. Mol. Struct.: THEOCHEM* 2004, **673**, 203–209.
- [10] E. D. Glendening, J. K. Badenhoop, A. E. Reed, J. E. Carpenter, J. A. Bohmann, C. M. Morales, P. Karafiloglou, C. R. Landis and F. Weinhold, *Theoretical Chemistry, University of Wisconsin* **2018**.
- [11] R. F. W. Bader, *Chem. Rev.* 1991, **91**, 893.
- [12] T. Lu, F. Chen, *J. Comp. Chem.* 2012, **33**, 580.
- [13] *Chemcraft - graphical software for visualization of quantum chemistry computations.* Version 1.8, build 654.
- [14] M. L. H. Green, *J. Organomet. Chem.* 1995, **500**, 127.
- [15] C. Mohapatra, L. Scharf, T. Scherpf, B. Mallick, K.-S. Feichtner, C. Schwarz and V. H. Gessner, *Angew. Chem. Int. Ed.* 2019, **58**, 7459
- [16] Y.-F. Yang, C. Foo, R. Ganguly, Y. Li, and C.-W. So, *Organometallics* 2012, **31**, 6538.
- [17] S. Khan, G. Gopakumar, W. Thiel and M. Alcarazo, *Angew. Chem. Int. Ed.* 2013, **52**, 5644.
- [18] J.-C. Berthet, G. Siffredi, P. Thuéry, and M. Ephritikhine, *Dalton Trans.* 2009, **18**, 3478–3494.
